1

2

3

4 **Arrhythmia-associated Calmodulin Variants Interact with KCNQ1 to Confer Aberrant**  
5 **Membrane Trafficking and Function**

6

7 Po wei Kang<sup>1</sup>, Lucy Woodbury<sup>1</sup>, Paweorn Angsutararux<sup>1</sup>, Namit Sambare<sup>1</sup>, Jingyi Shi<sup>1</sup>, Martina  
8 Marras<sup>1</sup>, Carlota Abella<sup>1</sup>, Anish Bedi<sup>1</sup>, DeShawn Zinn<sup>1</sup>, Jianmin Cui<sup>1</sup>, and Jonathan R. Silva<sup>1,#</sup>

9

10

11

12 <sup>1</sup>Department of Biomedical Engineering, Washington University in St. Louis, MO, USA

13

14

15 <sup>#</sup>To whom correspondence should be addressed:

16 Jonathan R. Silva, PhD

17 E-mail: [jonsilva@wustl.edu](mailto:jonsilva@wustl.edu)

1 **Abstract**

2 **Rationale:** Missense variants in calmodulin (CaM) predispose patients to arrhythmias associated  
3 with high mortality rates. As CaM regulates several key cardiac ion channels, a mechanistic  
4 understanding of CaM variant-associated arrhythmias requires elucidating individual CaM variant  
5 effect on distinct channels. One key CaM regulatory target is the KCNQ1 (K<sub>v</sub>7.1) voltage-gated  
6 potassium channel that underlie the I<sub>Ks</sub> current. Yet, relatively little is known as to how CaM  
7 variants interact with KCNQ1 or affect its function.

8 **Objective:** To observe how arrhythmia-associated CaM variants affect binding to KCNQ1,  
9 channel membrane trafficking, and KCNQ1 function.

10 **Methods and Results:** We combine a live-cell FRET binding assay, fluorescence trafficking  
11 assay, and functional electrophysiology to characterize >10 arrhythmia-associated CaM variants  
12 effect on KCNQ1. We identify one variant (G114W) that exhibits severely weakened binding to  
13 KCNQ1 but find that most other CaM variants interact with similar binding affinity to KCNQ1  
14 when compared to CaM wild-type over physiological Ca<sup>2+</sup> ranges. We further identify several  
15 CaM variants that affect KCNQ1 and I<sub>Ks</sub> membrane trafficking and/or baseline current activation  
16 kinetics, thereby contextualizing KCNQ1 dysfunction in calmodulinopathy. Lastly, we delineate  
17 CaM variants with no effect on KCNQ1 function.

18 **Conclusions:** This study provides comprehensive functional data that reveal how CaM variants  
19 contribute to creating a pro-arrhythmic substrate by causing abnormal KCNQ1 membrane  
20 trafficking and current conduction. We find that CaM variant regulation of KCNQ1 is not uniform  
21 with effects varying from benign to significant loss of function. This study provides a new  
22 approach to collecting details of CaM binding that are key for understanding how CaM variants  
23 predispose patients to arrhythmia via the dysregulation of multiple cardiac ion channels.

24

25 **Key words:** KCNQ1, K<sub>v</sub>7.1, calmodulin, channelopathy, ion channels, arrhythmia

## 1 **Introduction**

2 Calmodulin (CaM) is a ubiquitous auxiliary subunit of key ion channels underlying the  
3 cardiac action potential. In the heart, CaM regulatory targets include ryanodine receptors (RyR2)  
4 and several voltage-gated channels including calcium channels (e.g. Cav1.2), sodium channels  
5 (e.g. Nav1.5), and potassium channels (e.g. KCNQ1 or Kv7.1) <sup>1-6</sup>. CaM canonically acts as a Ca<sup>2+</sup>  
6 sensor and confers Ca<sup>2+</sup> sensitivity to channels to allow Ca<sup>2+</sup>-dependent inactivation in Cav1.2 and  
7 Nav1.4 <sup>1,3,7</sup>. Independent of Ca<sup>2+</sup>-sensing function, CaM binding also modulates baseline channel  
8 function in Cav1.2, Nav1.5, and KCNQ1 <sup>8-11</sup>. Inherited or *de novo* mutations in these channels  
9 causing CaM dysregulation are associated with arrhythmias such as Timothy syndrome (TS),  
10 Brugada syndrome (BrS), and long QT syndrome (LQTS) <sup>9,12-14</sup>. Three genes in the human genome  
11 (*CALMI-3*) encode for CaM with 100% conservation in amino acid identity <sup>3,15</sup>, and CaM was  
12 long-thought to be intolerant of primary sequence alterations. Recently, human missense variants  
13 in CaM have emerged as a molecular factor underlying arrhythmias (“calmodulinopathy”) such as  
14 LQTS and catecholaminergic polymorphic ventricular tachycardia (CPVT) associated with high  
15 mortality rate <sup>14,16-20</sup>. As CaM variants cause dysfunction in many combinations of their regulatory  
16 targets, calmodulinopathy mechanisms are fundamentally complex. Extensive studies have  
17 established that several CaM missense variants impair Ca<sup>2+</sup> binding <sup>16,21-28</sup>. To date, CaM variants  
18 are most extensively evaluated as related to Cav1.2 or RyR2, with many variants shown to induce  
19 Cav1.2 and RyR2 dysfunction thereby contributing to arrhythmogenesis <sup>14,22,27,29-34</sup>. By  
20 comparison, relatively little is known regarding whether CaM variants may also alter KCNQ1  
21 channel function and membrane expression, with only a few studies suggesting potential effects  
22 <sup>10,28,35</sup>. Moreover, the relative contributions of trafficking, gating effects, and binding are not well-  
23 delineated for different variants. These knowledge gaps represent a missing piece for in-depth  
24 understanding of calmodulinopathy mechanisms that integrate distinct CaM regulatory targets.

25 In the heart, KCNQ1 is a homo-tetrameric potassium channel that associates with the  
26 auxiliary subunits KCNE1 and CaM to conduct the slow delayed rectifier current (I<sub>Ks</sub>), which

1 participates in action potential repolarization primarily in the context of  $\beta$ -adrenergic stimulation  
2 <sup>5,6,36-38</sup>. Structurally, CaM interacts with Helix A and Helix B within the KCNQ1 carboxy-terminus  
3 domain (CTD) as well as the S2-S3 linker within the KCNQ1 voltage-sensing domain (VSD) (Fig.  
4 1A-B) <sup>5,6,10,35,38,39</sup>. CaM association with KCNQ1 is required for channel assembly and membrane  
5 trafficking <sup>5,6</sup>. CaM further exerts functional effects by triggering current enhancement upon  
6 elevated intracellular  $\text{Ca}^{2+}$  and modulating KCNQ1 and  $\text{I}_{\text{Ks}}$  baseline current under resting  $\text{Ca}^{2+}$   
7 conditions <sup>10,39-41</sup>. Mechanistically, KCNQ1 features a gating mechanism leveraged by CaM and  
8 KCNE1 to modulate the channel. Upon membrane depolarization, the KCNQ1 VSD activates in a  
9 two-step manner, from the resting state to a stable intermediate state, then to the activated state  
10 <sup>38,42-44</sup>. VSD occupancy of the intermediate and the activated states both trigger KCNQ1 pore  
11 opening, yielding two open states <sup>42-44</sup>. KCNE1 suppresses intermediate state conductance to help  
12 delay current activation kinetics <sup>43,44</sup>. CaM controls channel occupancy of the activated state to  
13 modulate KCNQ1 current activation kinetics <sup>10</sup>. Taken together, CaM missense variants have the  
14 potential to alter multiple KCNQ1 parameters from trafficking to current conductance, all of which  
15 may lead to abnormal action potential repolarization.

16 Here, we perform extensive characterization of >10 CaM variants to determine whether  
17 KCNQ1 dysfunction contributes to calmodulinopathy-related arrhythmias (Fig. 1B-C). The CaM  
18 variants investigated here cover nearly all currently known variant positions. We employ a novel  
19 fluorescence resonance energy transfer (FRET) assay to quantify CaM variants binding to full-  
20 length KCNQ1 in live cells, thereby identifying CaM variants capable of competing with CaM  
21 wild-type (WT) for binding KCNQ1. Using fluorescence assays and functional electrophysiology,  
22 we further identify specific CaM variants that confer abnormal KCNQ1 membrane trafficking or  
23 aberrant current conduction. In all, our results systematically map distinct CaM variant effects to  
24 KCNQ1 binding, membrane trafficking, and current conduction, delineating how KCNQ1  
25 dysfunction contributes to calmodulinopathy.

26

## 1 **Results**

### 2 **A FRET-based assay to probe CaM interaction with full-length KCNQ1**

3           Although calmodulin is encoded by three genes in the human genome, the presence of one  
4 gene carrying a missense variant is sufficient to induce arrhythmia<sup>16-19</sup>. This genetic pattern  
5 suggests that CaM variants and CaM WT are both expressed in cardiomyocytes. Thus, CaM  
6 variants competes with CaM WT for binding to their regulatory targets. As KCNQ1 channel  
7 assembly and membrane expression require CaM association<sup>5,6</sup>, the ability for CaM variants to  
8 bind KCNQ1 figures critically into whether the variant may impart current dysfunction on  
9 membrane-expressing KCNQ1. To explore this question, we developed a FRET assay to quantify  
10 binding between CaM and KCNQ1 channels in live cells. FRET is a phenomenon in which  
11 nanometer proximity ( $< \sim 100\text{\AA}$ ) between two appropriate fluorophores can be optically detected  
12 and has been successfully employed to study CaM-channel interaction<sup>29,45-48</sup>. Here, we innovated  
13 on prior techniques through the design of a novel FRET pairs between CaM and full-length  
14 KCNQ1, as well as the development of an EMCCD camera-based imaging technique and  
15 automated analysis to efficiently quantify binding between CaM variants and KCNQ1 (see  
16 extended methods).

17           In developing the FRET assay, we first selected the well-characterized Cerulean-Venus  
18 FRET pair<sup>49</sup> and screened for optimal fluorophore placement to detect FRET signal between CaM  
19 and the full-length KCNQ1. Cerulean was labeled to the CaM carboxy-terminus by fusion,  
20 enabling the Cerulean-tagged CaM to act as a FRET donor (Fig. 1D). For the FRET acceptor, we  
21 screened for optimal labeling position by fusing a Venus to the carboxy-terminus or the cytosolic  
22 Helix A – Helix B (HAB) linker of the full-length KCNQ1. Insertion of a Venus fluorophore within  
23 the KCNQ1 HAB linker after residue S484, which we term KCNQ1-VenHAB, yielded a channel  
24 with preserved channel trafficking and ionic conductance when assayed by two-electrode voltage-  
25 clamp (TEVC) in *Xenopus* oocytes (Fig. 1D, SFig. 1A-B). The KCNQ1 HAB linker is an  
26 approximately 100 residues long disordered cytosolic loop situated between the two main CaM

1 binding helices in the KCNQ1 CTD<sup>35,38,39</sup>. Previous studies have found that HAB linker truncation  
2 does not affect KCNQ1 function<sup>50</sup>. The lack of an apparent functional role for the HAB linker  
3 may explain the channel's tolerance to a fluorophore insertion within the HAB linker. Moreover,  
4 Cerulean-tagged CaM exhibited higher maximum FRET efficiency with KCNQ1-VenHAB ( $E_{\text{Max}}$   
5  $\sim 0.34$ ) when compared to labeling Venus at the KCNQ1 carboxy-terminus ( $E_{\text{Max}} \sim 0.17$ ) (SFig. 1  
6 and SFig. 2). This enhanced maximum FRET efficiency is likely due to the closer distance between  
7 CaM and the KCNQ1 HAB linker as compared to the KCNQ1 carboxy-terminus, although an  
8 orientation-dependent factor cannot be ruled out. We selected KCNQ1-VenHAB as the FRET  
9 acceptor in our assay owing to its enhanced maximum FRET efficiency.

10 To examine binding between CaM and the full-length KCNQ1 channel, we co-transfected  
11 Cerulean-tagged CaM and KCNQ1-VenHAB in CHO cells followed by fluorescence imaging  
12 using a custom FRET microscope with an EMCCD camera and an optical splitter to  
13 simultaneously image fluorescence intensity at the donor and acceptor emission wavelengths (Fig.  
14 1E, see Extended Methods). The acquired images were then analyzed with MATLAB software to  
15 compute an apparent FRET efficiency metric  $E_{\text{D}}$  in 1580 cells across 7 independent transfections  
16 (Fig. 1E-F, also see Extended Methods). The measured apparent FRET efficiency  $E_{\text{D}}$  observed in  
17 each cell depends on two main factors: (1) the true FRET efficiency influenced by the relative  
18 orientation and distance between donor and acceptor fluorophores in the bound complex  
19 (KCNQ1/CaM in this case), and (2) the binding reaction between the protein pair (KCNQ1 and  
20 CaM) that depends on the relative concentrations of the protein pair expressed within the cell (i.e.  
21 whether the FRET pairs are bound). Prior studies have shown that the latter factor can be leveraged  
22 to quantify relative binding affinity between the labeled FRET pairs. Specifically, variation in  
23 transfection efficiency leads to varying titration of free concentrations of FRET donor and acceptor  
24 in each cell, enabling fitting of a FRET binding curve by imposing an appropriate binding model  
25<sup>47,51,52</sup>. Because the KCNQ1/CaM complex exists in a 4:4 stoichiometry with likely identical and  
26 independent binding<sup>35,38</sup>, we fitted the  $E_{\text{D}}$  readouts to a 1:1 (equivalent to 4:4) binding model to

1 derive a FRET binding curve with an apparent dissociation constant ( $K_{D, \text{Eff}}$ ) related to the binding  
2 affinity between CaM and KCNQ1 (Fig. 1F, also see Extended Methods). This analysis yielded a  
3 FRET binding curve demonstrating a clear rise in  $E_D$  as the number of free KCNQ1-VenHAB  
4 increased with an estimated  $K_{D, \text{Eff}} = 30.2$  AU (Fig. 1F, blue dots and curve), indicating proximity  
5 and binding between Cerulean-tagged CaM and KCNQ1-VenHAB. We note that the estimated  
6  $K_{D, \text{Eff}}$  is in arbitrary units (AU) but can be compared across different constructs for relative binding  
7 changes. Although our assay does not report an absolute binding affinity, our method enables  
8 quantification of CaM interaction with the full-length KCNQ1 channel within live CHO cells.  
9 Furthermore, CaM has been shown to interact with other KCNQ1 regions such as the  
10 transmembrane voltage-sensing domain<sup>10,35,38</sup>, which can be difficult to reconstitute in *in vitro*  
11 systems but is fully accounted for in our FRET assay.

12 To further validate our assay, we measured FRET between Cerulean-tagged CaM and  
13 KCNQ1-VenHAB carrying mutations known to disrupt CaM binding to the channel. We mutated  
14 the key “IQ” residues in KCNQ1 Helix A (Fig. 1A) known to be important for CaM C-lobe binding  
15<sup>35,38,39</sup> to double alanines (I375A/Q376A or IQ/AA). Analysis of FRET results between CaM and  
16 KCNQ1-VenHAB-IQ/AA revealed negligible FRET signals beyond those observed with negative  
17 controls (Fig. 1F, red, SFig. 1C-D), consistent with the lack of binding between CaM and KCNQ1-  
18 IQ/AA. Taken together, our FRET assay detected robust binding between CaM and KCNQ1 WT  
19 as well as no interactions between CaM and KCNQ1 IQ/AA designed to ablate CaM binding to  
20 KCNQ1. These results validated our assay for probing interactions between CaM variants and the  
21 full-length KCNQ1 channel in live cells.

## 22 **CaM variants interact with KCNQ1 with different affinities**

23 We next applied our FRET-based assay to probe whether CaM variants bind to the full-  
24 length KCNQ1 differently compared to CaM WT. We generated 14 Cerulean-tagged CaM  
25 missense variants, including 13 arrhythmia-linked variants (E46K, N54I, N98S, A103V, E105A,  
26 G114W, D130G, D132H, D132N, D134H, Q136P, E141G, and F142L) and 1 non-arrhythmia-

1 linked variant identified in the gnomAD database (Q50R) <sup>17,53</sup>. FRET measurements were  
2 performed between each CaM variant and KCNQ1-VenHAB co-transfected in CHO cells under  
3 resting or “basal” intracellular  $[Ca^{2+}]$  conditions. The “basal” intracellular  $[Ca^{2+}]$  condition was  
4 designed to mimic resting low  $[Ca^{2+}]$  during cardiac diastole and was attained by imaging CHO  
5 cells incubated in HBSS solutions containing 1.25 mM  $Ca^{2+}$ . We then fitted an estimated  $K_{D,eff}$   
6 and constructed the 95% confidence interval by bootstrapping for each CaM variants (Fig. 2, SFig.  
7 3, Supplementary Table 1). Statistical significance in binding affinities were determined if the 95%  
8 confidence interval of the CaM variant did not overlap with that of the WT control. Our screening  
9 identified four CaM variants (E46K, G114W, F142L, and Q50R) which exhibited statistically  
10 significant decreased binding affinity to KCNQ1 (increased  $K_{D,eff}$ ) when compared to CaM WT  
11 (Fig. 2A,C). The CaM E46K variant featured a 2.6-fold reduction in binding affinity ( $K_{D,eff} = 70.23$   
12 AU E46K vs 30.2 AU WT). Although the reduction in binding is significant, the modest 2.6-fold  
13 decrease in affinity suggests that KCNQ1 channels in cardiomyocytes may still pre-associate with  
14 CaM E46K depending on the relative concentrations of the CaM E46K variant vs. WT. By contrast,  
15 the CaM G114W variant exhibited greatly diminished binding to KCNQ1 (Fig. 2A). We were  
16 unable to obtain a reliable  $K_{D,eff}$  estimate between CaM G114W and KCNQ1 due to the minimal  
17 rise in  $E_D$  signals (Fig. 2A), with the best estimate indicating at least 2-orders of magnitude increase  
18 in  $K_{D,eff}$ . Nevertheless, this result indicates KCNQ1 channels in cardiomyocytes carrying the CaM  
19 G114W variant are likely devoid of CaM G114W and are instead endowed with CaM WT.  
20 Structurally, neither CaM E46 nor G114 are direct  $Ca^{2+}$ -coordinate residues. CaM E46 is located  
21 within the N-lobe EF1-EF2 linker while CaM G114 is situated within the C-lobe EF3-EF4 linker  
22 (Fig. 1C). Their positions suggest that CaM E46K and G114W likely disrupt CaM/KCNQ1  
23 binding by altering N-lobe interaction with Helix B and C-lobe interaction with Helix A,  
24 respectively. However, potential allosteric effects of each variant on the opposing lobe cannot be  
25 ruled out.



1 Majority of variants analyzed (10/14) demonstrated similar or better binding affinity to  
2 KCNQ1 when compared to CaM WT under basal intracellular  $[Ca^{2+}]$  conditions. Two variants  
3 (E105A, D130G) exhibited significantly smaller  $K_{D,eff}$  estimates indicating enhanced binding  
4 affinity to KCNQ1 compared to WT (Fig. 2A,C). The remaining variants such as CaM N54I or  
5 CaM A103V yielded similar  $K_{D,eff}$  estimates compared to WT (Fig. 2A,C). Taken together, these  
6 results demonstrate that most CaM variants can sufficiently compete with their WT counterpart  
7 and interact with KCNQ1 in a dominant negative manner. Even among the variants with reduced  
8 binding, CaM E46K only showed a mild 2.6-fold reduction. Our screening included variants in  
9 multiple CaM regions in both N- and C-lobes, suggesting KCNQ1/CaM interaction is generally  
10 tolerant of single missense mutation throughout CaM.

11 The results so far show that most CaM variants can compete with CaM WT for binding  
12 KCNQ1 in a live cell context under basal intracellular  $[Ca^{2+}]$  conditions. In the cardiac cycle, CaM  
13 can coordinate  $Ca^{2+}$  ions and change conformation when intracellular  $[Ca^{2+}]$  rises during systole,  
14 thereby potentially changing CaM interaction with KCNQ1. We therefore undertook additional  
15 FRET experiments with CaM WT and variants under elevated intracellular  $[Ca^{2+}]$  conditions to  
16 explore potential  $Ca^{2+}$ -dependent effects. To this end, we incubated transfected CHO cells in  
17 solutions containing 10 mM  $Ca^{2+}$  and 4  $\mu$ M ionomycin for at least 15 minutes prior to imaging.  
18 This “high”  $[Ca^{2+}]$  condition was designed to saturate intracellular  $[Ca^{2+}]$  beyond levels  
19 experienced during cardiac systole. FRET binding curves obtained between KCNQ1-VenHAB  
20 and cerulean-tagged CaM WT revealed similar binding affinity ( $K_{D,eff} = 27.3$  AU) compared to  
21 basal  $Ca^{2+}$  conditions ( $K_{D,eff} = 30.2$  AU) (Fig. 2B,D), suggesting that CaM binding affinity to  
22 KCNQ1 may not change dramatically between diastole and systole in a cardiomyocyte. Our  
23 finding that CaM binding to KCNQ1 is not significantly affected by raising intracellular  $[Ca^{2+}]$  is  
24 consistent with prior studies demonstrating that  $I_{Ks}$  ionic current is maximally activated over  
25 physiological ranges of intracellular  $[Ca^{2+}]$ <sup>40,41</sup>. Next, we performed FRET binding analysis of the  
26 CaM variants which generally yielded the same trends as those seen in basal  $[Ca^{2+}]$  conditions,

1 with most variants exhibiting similar or stronger binding affinity to KCNQ1 (Fig. 2D, SFig. 4,  
2 Supplementary Table 2). Among the variants with reduced binding in the basal  $[Ca^{2+}]$  conditions,  
3 the CaM G114W variant maintained a severe loss of interaction with KCNQ1 (Fig. 2B). This  
4 finding indicates that the CaM G114W likely does not associate with KCNQ1 at any point during  
5 the cardiac cycle. Similarly, the CaM E46K variant featured roughly 2-fold reduced binding  
6 affinity ( $K_{D,eff} = 63.1$  AU) compared to WT in high  $[Ca^{2+}]$  conditions, mirroring the results seen  
7 in basal  $[Ca^{2+}]$  conditions. This suggests that CaM E46K association to KCNQ1 is also likely  
8 unaffected by calcium cycling within cardiomyocytes. Curiously, we found one variant, CaM  
9 E105A, which showed enhanced affinity to KCNQ1 under basal  $Ca^{2+}$  conditions but no significant  
10 difference compared to WT under high  $Ca^{2+}$  conditions (Fig. 2B,D). However, the confidence  
11 interval for CaM E105A was large in our  $K_{D,eff}$  estimation, so the results may fall within the margin  
12 of error. For most variants, such as CaM A103V, there were no significant differences for CaM  
13 variant binding affinity to KCNQ1 under high  $Ca^{2+}$  conditions when compared to WT (Fig. 2B,  
14 2D). Taking the combined FRET results together, our findings suggest that most CaM variants  
15 feature WT-like binding affinity to KCNQ1 over physiological ranges of intracellular  $[Ca^{2+}]$ . As  
16 these variants are capable of pre-association to KCNQ1, our findings further delineate the CaM  
17 variants which may confer KCNQ1 current dysfunction in cardiomyocytes.

### 18 **Effect of CaM variants on KCNQ1 membrane trafficking**

19 Given the finding that most CaM variants feature similar binding affinity to KCNQ1 as  
20 CaM WT, we next investigated how CaM variants association to KCNQ1 may affect current  
21 conduction. Previous studies have shown that CaM facilitates KCNQ1 biogenesis and trafficking  
22 to the plasma membrane<sup>5,6</sup>. Thus, CaM variants may modulate current amplitude by affecting  
23 channel membrane trafficking. To explore this possibility, we developed a fluorescence-based  
24 assay to compare KCNQ1 membrane trafficking efficiency when co-expressed with CaM variants  
25 vs. CaM WT. We generated a pseudo-WT (psWT) KCNQ1 construct in which a Cerulean is tagged  
26 to the carboxy-terminus and a hemagglutinin (HA) tag is inserted within the extracellular S1-S2

1 linker between E146 and Q147 (Fig. 3A, KCNQ1-psWT-HA-Cer). The extracellular HA tag  
2 enabled targeted fluorescence labeling of KCNQ1 channels on the plasma membrane with an  
3 Alexa Fluor 594 (Alexa-594) fluorophore. By contrast, the carboxy terminus-labeled Cerulean  
4 afforded an estimation for the total number of KCNQ1 channels within each cell. In each cell  
5 transfected with this construct, we defined an apparent trafficking efficiency metric by the  
6 fluorescence intensity ratio of Alexa-594 (plasma membrane-bound KCNQ1) to Cerulean (total  
7 KCNQ1),

$$8 \quad \text{Apparent Trafficking Efficiency} = \frac{S(\text{Alexa-594})}{S(\text{Cerulean})}$$

9 In this assay, we co-transfected CHO cells with KCNQ1-psWT-HA-Cer with CaM WT.  
10 36 hours after transfection, the plasma membrane-bound channels were labeled with a primary  
11 anti-HA antibody followed by an Alexa-594 secondary antibody. During staining with the anti-  
12 HA antibody, the cells were fixed but not permeabilized through PFA fixation, thus ensuring  
13 Alexa-594 were only conjugated on the plasma membrane-bound KCNQ1. The cells were then  
14 imaged by confocal microscopy, which revealed robust Cerulean and Alexa-594 fluorescence (Fig.  
15 3B, top 2 panels). Cerulean signal could be seen throughout the cells, while Alexa-594 signals  
16 were most evident at the cell membrane, suggesting specific Alexa-594 labeling of membrane-  
17 bound channels. Similar fluorescence measurements over 226 cells and revealed an apparent  
18 trafficking efficiency of  $0.171 \pm 0.010$  AU (mean  $\pm$  SEM), establishing a baseline value to which  
19 we can compare potential CaM variants effect on KCNQ1 trafficking (Fig. 3C, light gray dot). For  
20 negative control, we co-transfected CHO cells with cerulean-tagged KCNQ1 without HA tags in  
21 the S1-S2 linker (KCNQ1-psWT-Cer) and performed the same Alexa-594 staining. Confocal  
22 imaging of these constructs revealed robust cerulean intensity but minimal Alexa-594 signals (Fig.  
23 3B, second row). The apparent trafficking efficiency computed for this negative control construct  
24 over 200 cells was  $0.076 \pm 0.005$  AU (Fig. 3C), demonstrating a clear decrease in our trafficking  
25 efficiency metric.

1           With our assay, we next tested how arrhythmia-associated CaM variants may affect  
2 KCNQ1 membrane trafficking by measuring the apparent trafficking efficiency of KCNQ1-HA-  
3 Cer co-transfected with various CaM variants (Fig. 3B-C). Significant differences in membrane  
4 trafficking were determined by one-way ANOVA followed by Dunnett's test. We found that seven  
5 CaM variants (Q50R, N54I, A103V, E105A, D132H, D132N, E141G) had no effect on KCNQ1  
6 trafficking efficiency compared to CaM WT (Fig. 3C, Supplementary Table 3). As CaM N54I,  
7 A103V, D132H, D132N, and E141G exhibited similar binding affinity to KCNQ1 compared to  
8 CaM WT (Fig. 2C), the trafficking assay data indicate that these variants likely do not contribute  
9 to arrhythmia by modifying  $I_{Ks}$  or KCNQ1 current amplitude through changing channel trafficking  
10 efficiency.

11           On the other hand, we found three CaM variants (E46K, F90L, and D132E) that reduced  
12 KCNQ1 trafficking efficiency compared to CaM-WT (Fig. 3B-C, Supplementary Table 3). CaM  
13 E46K and F90L exhibited mean apparent trafficking efficiency of 0.121 and 0.114 AU,  
14 respectively, representing approximately 70% and 67% membrane trafficking compared to WT.  
15 These findings suggest that these variants may contribute to arrhythmogenesis in part by reducing  
16  $I_{Ks}$  or KCNQ1 current amplitude in cardiomyocytes.

17           Lastly, we found five CaM variants (D96V, G114W, D130G, D134H, Q136P) increased  
18 KCNQ1 trafficking efficiency compared to CaM-WT (Fig. 3B-C, Supplementary Table 3). The  
19 variants D134H and Q136P have an apparent trafficking efficiency of 0.243 AU and 0.246 AU or  
20 approximately 140% trafficking efficiency compared to WT. As D134H and Q136P bind KCNQ1  
21 with similar affinity as CaM WT, these results suggest that these mutants may contribute to  
22 arrhythmogenesis in part by increasing  $I_{Ks}$  of KCNQ1 current amplitude. Compared to D134H and  
23 Q136P, CaM G114W had a striking apparent trafficking efficiency of 0.324 AU or 180% of WT  
24 (Fig. 3B-C). The finding that CaM G114W, which exhibits minimal binding to KCNQ1 (Fig. 2C),  
25 increased KCNQ1 trafficking efficiency is interesting. As our assay relies on CaM variant over-  
26 expression without knocking down endogenous CaM WT within CHO cells, we interpreted this

1 result as CaM G114W over-expression preferentially binding other CaM targets within each cell.  
2 This may increase the fraction of endogenous CaM WT available to bind KCNQ1 within the cell,  
3 thereby leading to increased trafficking efficiency. Taken together, these data delineate the  
4 arrhythmia-associated CaM variants that affect KCNQ1 membrane trafficking efficiency, which  
5 may alter total  $I_{Ks}$  or KCNQ1 current amplitude to contribute to arrhythmogenesis.

## 6 **Select CaM variants affect baseline KCNQ1 current activation kinetics**

7 In addition to modulating KCNQ1 membrane trafficking, CaM is also known to affect  
8 KCNQ1 gating<sup>5,10</sup>. Previous studies have shown that CaM tunes KCNQ1 function by modulating  
9 baseline current activation kinetics through controlling channel entry into the fully activated open  
10 state independent of intracellular  $Ca^{2+}$ <sup>10</sup>. Given the numerous CaM variants exhibiting WT-like  
11 interaction with KCNQ1, some of the CaM variants may disrupt KCNQ1 baseline function leading  
12 to arrhythmogenesis observed in variant carriers. To examine this possibility, we undertook TEVC  
13 experiments in *Xenopus* oocytes. In contrast to the FRET experiments, TEVC was performed with  
14 unlabeled KCNQ1 and CaM to avoid potential artifact related to fluorophore fusion. The *Xenopus*  
15 oocyte system further enabled direct injection of RNA encoding KCNQ1 and CaM variants, side-  
16 stepping potential co-transfection issues in mammalian cell lines. We did not suppress endogenous  
17 CaM in *Xenopus* oocyte, which shares 100% amino acid identity with human CaM. This was due  
18 to our FRET assay demonstrating most CaM variants can compete with WT, and CaM variants are  
19 co-translated with CaM WT in cardiomyocytes *in vivo*. Figure 4A illustrates exemplar ionic  
20 current recorded when KCNQ1 was co-expressed with CaM WT and subjected to a series of test  
21 voltage pulses. At higher depolarizing pulses, KCNQ1 current featured two distinct time-  
22 dependent components of activation (Fig. 4A, red arrow), fast and slow. These two components  
23 have been previously shown to approximate KCNQ1 entry into distinct open states<sup>54</sup>. We next  
24 screened KCNQ1 co-expressed with CaM variants studied in our FRET assay with TEVC. We  
25 replaced the CaM N98S and F142L variants in the TEVC screen with the CaM N98I and D132E  
26 variants, as the former two have been previously reported in the context of KCNQ1<sup>10,35</sup>.

1 We first analyzed KCNQ1 steady-state activation property when co-expressed with  
2 different CaM variants by fitting the conductance-voltage (GV) relationship for the half-activation  
3 voltages ( $V_{1/2}$ ), which is the membrane voltage at which KCNQ1 channels are half maximally  
4 activated. Statistical significance for all fitted parameters were determined by ANOVA followed  
5 by Dunnett's test. Analysis of measured  $V_{1/2}$  showed minor differences between WT and all CaM  
6 variants probed (Fig. 4B, Supplementary Table 4). CaM D96V demonstrated a subtle but  
7 statistically significant 4.4 mV hyperpolarizing shift in  $V_{1/2}$  (adjusted p-value 0.037). All other  
8 variants tested revealed no differences in  $V_{1/2}$  compared to WT control. These results indicate that  
9 most CaM variants do not dramatically perturb the baseline ability of KCNQ1 to open at steady  
10 state.

11 Beyond steady-state response, CaM has been shown to modulate KCNQ1 activation  
12 kinetics<sup>10</sup>. As potassium current activation kinetics figure critically in action potential duration,  
13 we next quantified current activation kinetics at 20-mV depolarization by fitting the current  
14 tracings to a bi-exponential function with fast and slow components ( $\tau_{fast}$  and  $\tau_{slow}$ ). As shown in  
15 Figure 4C, KCNQ1 WT co-expressed with CaM WT yielded ionic currents well-fitted by a bi-  
16 exponential function when depolarized to 20 mV (red fit vs. black current tracing). We next  
17 performed the same bi-exponential fitting procedure on KCNQ1 activation kinetics at 20-mV  
18 depolarization when co-expressed with CaM variants (Fig. 4C-E). This analysis revealed that the  
19 CaM E46K variant significantly affected KCNQ1 current activation. Specifically, CaM E46K  
20 induced a lengthening of  $\tau_{fast}$  (0.062 WT vs. 0.084 E46K, adjusted p-value < 0.0001) and a  
21 reduction of  $\tau_{slow}$  (0.973 WT vs. 0.695 E46K, adjusted p-value < 0.0001) when compared to WT  
22 (Fig. 4C-E). These two effects together decelerated the fast component and accelerated the slow  
23 component, yielding a more rounded appearance for current activation kinetics (Fig. 4A, red  
24 arrow). The reduction in  $\tau_{slow}$  dominated in a 20-mV 4-second test pulse, with KCNQ1 + CaM  
25 E46K current reaching steady-state more rapidly than WT as shown by normalized current  
26 superposition (Fig. 4C, solid black vs. gray). To further test whether E46K affected activation, we

1 performed kinetics fitting at various test voltages and found that it induced consistent increases in  
2  $\tau_{\text{fast}}$  and decreases in  $\tau_{\text{slow}}$  for test voltages ranging from -10 mV to +60 mV (Fig. 4F), providing  
3 additional validation for CaM E46K effect on KCNQ1 kinetics. Analysis of other CaM variants  
4 revealed that CaM variants N54I and E141G significantly increased  $\tau_{\text{slow}}$  but spared  $\tau_{\text{fast}}$  at 20 mV  
5 (Fig. 4E), indicating that CaM N54I and E141G slow KCNQ1 current onset upon membrane  
6 depolarization. The ability of the CaM E46K, N54I, and E141G variants to modulate the slow  
7 kinetics component is consistent with prior studies demonstrating a role for CaM in modulating  
8 the KCNQ1 activation<sup>10</sup>.

9 The remaining CaM variants assayed did not yield significant kinetics changes compared  
10 to WT at 20 mV (Fig. 4D-E). Notably, the CaM G114W variant induced no changes in either  $\tau_{\text{fast}}$   
11 or  $\tau_{\text{slow}}$  when the test pulse ranged from -10 mV to +60 mV (Fig. 4C-F). As CaM G114W variant  
12 features severely reduced binding to KCNQ1, this finding is consistent with the idea that CaM  
13 G114W cannot compete with CaM WT for KCNQ1, leading to the channel associating with  
14 endogenous CaM WT and exhibiting WT behavior.

15 Taken together, our results suggest that CaM modulation of KCNQ1 kinetics may be  
16 physiologically relevant and further delineate CaM variants that can modulate baseline KCNQ1  
17 current. These kinetic alterations may interact nonlinearly in the cardiac action potential to  
18 contribute to arrhythmogenesis.

### 19 **Select CaM variants affect baseline $I_{\text{Ks}}$ current activation kinetics**

20 Although the KCNQ1-CaM complex constitutes a fully functional voltage-dependent  
21 channel, KCNQ1 additionally interacts with the auxiliary subunit KCNE1 in cardiomyocytes to  
22 conduct the slow delayed rectifier current ( $I_{\text{Ks}}$ )<sup>36,37,55</sup>. We will refer to the KCNQ1+KCNE1  
23 complex as  $I_{\text{Ks}}$ . Functionally, KCNE1 causes a significant depolarizing shift in the KCNQ1 steady-  
24 state  $V_{1/2}$  and strongly decelerates current activation kinetics (Fig. 5A), both important factors in  
25 the physiological role of  $I_{\text{Ks}}$ . Given the importance of KCNE1 association to KCNQ1 in



1 cardiomyocytes, we undertook additional TEVC analysis to probe how KCNE1 may alter the  
2 ability of CaM variants to modulate baseline KCNQ1 current.

3 As in the prior KCNQ1 experiments, we first analyzed  $I_{Ks}$  steady-state activation when co-  
4 expressed with CaM variants in *Xenopus* oocytes. Similar to the results seen in the KCNQ1-only  
5 screen, all CaM variants screened exerted minor effects on  $I_{Ks}$  baseline half-activation voltage (Fig.  
6 5B, Supplementary Table 5). CaM D96V variant induced a subtle 7.26-mV hyperpolarizing shift  
7 in the  $V_{1/2}$  of  $I_{Ks}$  (adjusted p-value 0.034 by one-way ANOVA and Dunnett's test), mirroring the  
8 trend seen in the KCNQ1-only screen. All other CaM variants screened did not show statistically  
9 significant differences in  $I_{Ks}$   $V_{1/2}$  when compared to WT control (Fig. 5B). The comparable effects  
10 of CaM variants on KCNQ1 with and without KCNE1 co-expression suggest that KCNE1 does  
11 not confer additional ability for these CaM variants to modulate channel opening at steady state.

12 We next examined whether CaM variants modulate  $I_{Ks}$  activation kinetics by fitting the  
13 ionic currents with a single exponential function when depolarized to 30 mV. As  $I_{Ks}$  activates with  
14 a significant delay that cannot be fitted by an exponential function in the early phase, our fits  
15 incorporated a time lag ( $t_{Lag}$ ) before which the current data were not fitted (Fig. 5C, gray  
16 normalized ionic current and red fit) as in prior studies<sup>56</sup>. Kinetics fitting of  $I_{Ks}$  co-expressed with  
17 CaM WT revealed an activation time constant ( $\tau$ ) of  $3.52 \pm 0.24$  seconds (mean  $\pm$  SEM) at 30 mV  
18 (Fig. 5C-E). Next, the same fitting procedure was repeated for  $I_{Ks}$  co-expressed with CaM variants  
19 as summarized in Figure 5E, revealing three CaM variants (N54I, Q136P, and E141G) that  
20 significantly prolonged activation kinetics when compared to WT (adjusted p-values  $< 0.0001$ ,  
21 0.028, 0.0026 for N54I, Q136P, and E141G respectively). CaM E141G increased the activation  $\tau$   
22 of  $I_{Ks}$  to  $6.17 \pm 0.96$  seconds when depolarized to 30 mV, approximately 1.75-fold increase over  
23 that of WT and can be appreciated by comparison of normalized currents (Fig. 5C, left panel).  
24 Additional kinetics fitting of different step voltages from 30 mV to 100 mV further revealed a  
25 consistent increase in  $\tau$  when  $I_{Ks}$  is co-expressed with CaM N54I and E141G when compared to  
26 WT (Fig. 5D). Interestingly, CaM N54I and E141G also significantly increased  $\tau_{slow}$  when co-



1 expressed with KCNQ1 without KCNE1 (Fig. 4E). Taken together, these results suggest that CaM  
2 N54I and E141G may slow KCNQ1 and  $I_{Ks}$  activation kinetics by a similar mechanism. On the  
3 other hand, CaM Q136P did not significantly affect activation kinetics of KCNQ1 without KCNE1  
4 (Fig. 4E) but had an effect on  $I_{Ks}$  kinetics (Fig. 5E), suggesting that CaM Q136P requires KCNE1  
5 association to perturb channel gating.

6 In contrast, the remaining CaM variants did not affect  $I_{Ks}$  activation kinetics at 30 mV (Fig.  
7 5E). In particular, CaM G114W did not alter  $I_{Ks}$  activation kinetics over voltage ranges from 30  
8 mV to 100 mV (Fig. 5C-D). This result is further consistent with the idea that CaM G114W cannot  
9 associate with the channel carboxy-terminus, thus the membrane-trafficked  $I_{Ks}$  are endowed with  
10 endogenous CaM WT and exhibit WT behavior. Another notable variant is CaM E46K, which  
11 induced a decrease in  $\tau_{slow}$  or hastening of current kinetics in KNCQ1 without KCNE1 (Fig. 4E).  
12 Kinetics fitting for  $I_{Ks}$  co-expressed with CaM E46K revealed a trend of hastened activation  
13 kinetics (mean  $\tau = 2.88$  vs. 3.52 seconds for CaM E46K vs. CaM WT at 30 mV) consistent with  
14 the effects seen in KCNQ1 without KCNE1, but ultimately did not reach statistical significance  
15 after controlling for multiple comparisons (Fig. 5E). These findings suggest KCNE1 may blunt  
16 CaM E46K effect on KCNQ1 activation kinetics, rendering the kinetics effect on  $I_{Ks}$  more subtle  
17 compared to KCNQ1 alone.

18 Altogether, our functional screen demonstrates that select CaM variants can modulate  
19 baseline  $I_{Ks}$  function, with most significant effect on activation kinetics. Moreover, comparison  
20 between the  $I_{Ks}$  and KCNQ1 results generally demonstrates consistent effects by CaM variants  
21 N54I, D96V, and E141G, identifying CaM variants that can affect KCNQ1 gating regardless of  
22 KCNE1 association. Our functional screen thus delineates CaM variants (N54I, Q136P, E141G)  
23 that can modulate  $I_{Ks}$  baseline activation kinetics under resting intracellular  $Ca^{2+}$  conditions. As  
24 the speed of  $I_{Ks}$  activation aids in controlling the cardiac action potential duration, these CaM  
25 variants-induced changes in  $I_{Ks}$  function may work in concert with effects on other CaM targets to  
26 cause arrhythmia.

## 1 **Discussion**

2 Missense variants in CaM have emerged in recent years to underlie severe arrhythmia with  
3 high mortality rate<sup>14,16-20</sup>. As CaM targets numerous ion channels important to the cardiac action  
4 potential, the mechanisms of CaM-induced arrhythmia (“calmodulinopathy”) are necessarily  
5 complex. Multiple studies have shown that CaM variants can significantly impact Cav1.2 and/or  
6 RyR2 function<sup>14,16-18,23,26,27,29,30,32-34,57</sup>. By contrast, although CaM also associates and regulates  
7 KCNQ1 channel membrane trafficking and function, relatively little is known regarding whether  
8 KCNQ1 or I<sub>Ks</sub> dysfunction may also contribute to calmodulinopathy. Here, we applied extensive  
9 live-cell FRET binding assays, fluorescence-based membrane trafficking assays, and functional  
10 electrophysiology to contextualize KCNQ1 within CaM-induced arrhythmogenesis (Fig. 6).

### 11 **Most CaM variants can sufficiently compete with CaM WT for binding to KCNQ1**

12 As three independent genes encode CaM within the human genome, CaM variants likely  
13 compete with endogenous CaM WT for binding to KCNQ1 within cardiomyocytes. In this study,  
14 we examined whether a CaM variant may sufficiently compete with CaM WT with a FRET-based  
15 assay that quantify CaM variants binding to KCNQ1 in live cells. As CaM is known to interact  
16 with multiple KCNQ1 domains including the voltage-sensing domain, a key strength of our assay  
17 is quantification of CaM interaction with the full-length KCNQ1 channel. Our FRET-based screen  
18 demonstrates that most CaM variants (10/14 screened) interact with the full-length KCNQ1 with  
19 similar or better affinity compared to CaM WT under both resting and elevated intracellular [Ca<sup>2+</sup>]  
20 conditions, suggesting that most CaM variants can pre-associate with KCNQ1 in cardiomyocytes  
21 expressing both CaM variants and WT (Fig. 2 and Fig. 6A). One potential reason that many CaM  
22 variants exhibit similar binding affinity to KCNQ1 compared to WT may be because both CaM  
23 N-lobe and C-lobe participate in binding KCNQ1<sup>35,38,39,58</sup>. Mutational perturbation of one CaM  
24 lobe may be compensated by the other CaM lobe to maintain interaction with KCNQ1. Previous  
25 studies have also shown that several CaM variants (e.g. CaM F142L, D96V) bind with similar

1 affinity to other cardiac channels such as Cav1.2<sup>29,33</sup>. Our results extend the propensity for CaM  
2 variants to exhibit dominant negative interactions to KCNQ1.

3         Nevertheless, we identified four CaM variants (E46K, Q50R, G114W, and F142L) that  
4 exhibit reduced binding affinity to KCNQ1 when compared to WT (Fig. 6A). Three variants  
5 (E46K, Q50R, and F142L) feature mildly reduced binding affinity that could feasibly compete  
6 with CaM WT for KCNQ1 depending on the relative concentrations of CaM WT to variant within  
7 the cell. By contrast, CaM G114W variant represents an interesting case in that the variant appears  
8 to be unable to interact with KCNQ1. CaM G114W has been previously shown to exhibit impaired  
9 binding to RyR2 CaMBD2 and Cav1.2 IQ domain<sup>27</sup>, and our result indicates impaired binding  
10 extends to KCNQ1. Still, the G114W is significant in the context of KCNQ1 as KCNQ1-CaM  
11 interaction generally tolerates single missense mutation in our study. How G114W so strongly  
12 impairs CaM interaction with KCNQ1 remains a subject for future studies.

### 13 **CaM variants induce aberrant KCNQ1 membrane expression and current conduction**

14         Elucidating CaM variant binding to KCNQ1 represents the first step to contextualize  
15 KCNQ1's contribution to calmodulinopathy, as arrhythmia ultimately arises from cardiac action  
16 potential pathologies that are triggered by aberrant ionic currents. In KCNQ1, this may be due to  
17 the CaM variant effect on channel membrane trafficking or channel gating. We thus undertook  
18 extensive fluorescence and electrophysiology experiments to delineate CaM variant effects on  
19 KCNQ1 membrane trafficking and function. As illustrated in Figure 6B-C, our results identified  
20 several CaM variants with effect on KCNQ1 membrane trafficking (E46K, F90L, D96V, G114W,  
21 D130G, D132E, D134H, Q136P) as well as KCNQ1 or I<sub>Ks</sub> gating (E46K, N64I, D96V, E141G,  
22 Q136P). Given that CaM is well-established to be a key regulator for KCNQ1 membrane  
23 trafficking and gating<sup>5,6,10</sup>, these results highlight KCNQ1 dysfunction as an important  
24 consideration when elucidating arrhythmogenesis arising from CaM variants.

1           As KCNQ1 and  $I_{Ks}$  activation kinetics mediate cardiac action potential shortening during  
2  $\beta$ -adrenergic stimulation, how do the observed effects in our study correlate to arrhythmia  
3 phenotype? We note that caution should be taken when interpreting how CaM-induced KCNQ1  
4 dysfunction translates to the observed clinical phenotype, as CaM variants can affect multiple  
5 channels that non-linearly contribute to the cardiac action potential. Nevertheless, CaM variants  
6 with effect on KCNQ1 may be more likely to present with stress or exercise-induced arrhythmia.  
7 The CaM E141G and Q136P variants trigger a slower  $I_{Ks}$  activation kinetics compared to WT and  
8 may provide less repolarizing current, consistent with their association to LQTS<sup>17</sup>. By comparison,  
9 the CaM E46K variant induces a faster KCNQ1 activation kinetics and is associated with CPVT.  
10 As CPVT is thought to stem from abnormal  $Ca^{2+}$  handling during diastole<sup>59</sup>, the faster KCNQ1  
11 activation kinetics may contribute to the CPVT phenotype by prolonging diastole. Specifically,  
12 KCNQ1 dysfunction caused by CaM E46K may exacerbate the CPVT phenotype during  $\beta$ -  
13 adrenergic stimulation where  $I_{Ks}$  participates in action potential repolarization. However, CaM  
14 E46K is also associated with a reduction in trafficking efficiency, and the activation kinetics effects  
15 are more subtle more in  $I_{Ks}$  compared to KCNQ1. Adding to the complexity, some variants induce  
16 effects seemingly inconsistent with the observed arrhythmia phenotypes. For example, CaM D96V  
17 induces a subtle hyperpolarizing shift in KCNQ1 and  $I_{Ks}$  steady-state activation as well as increases  
18 KCNQ1 trafficking efficiency, both effects expected to increase  $K^+$  flux and shorten the cardiac  
19 action potential. Yet, CaM D96V is associated with a LQTS phenotype<sup>17</sup> and a loss of KCNQ1  
20 function would be expected. A likely cause of this difference is that CaM D96V effect on alternate  
21 CaM targets such as  $Ca_v1.2$  may more prominently drive action potential prolongation in  
22 cardiomyocytes compared to its effect on KCNQ1. Thus, the KCNQ1 interaction in this case is  
23 protective, and loss-of-function KCNQ1 variants in conjunction with D96V may be especially  
24 lethal. Lastly, several CaM variants screened in this study feature WT-like binding affinity to  
25 KCNQ1 and minimal effects on KCNQ1 and  $I_{Ks}$  channel membrane trafficking and gating (Q50R,  
26 A103V, E105A, D132H, D132N). Arrhythmia observed in carriers of these CaM variants likely  
27 do not arise from direct effect on baseline  $I_{Ks}$  or KCNQ1 current.

1 Clinically,  $\beta$ -blockers are commonly used as medical therapy to treat calmodulinopathy.  
2 Still,  $\beta$ -blockers are not equally efficacious in all patients, with more than half of medically treated  
3 patients experiencing breakthrough events including sudden cardiac death<sup>17</sup>. Risk stratification for  
4 patients most likely to benefit from  $\beta$ -blockade would allow for better therapeutic outcomes. Given  
5 the key role of KCNQ1 in the fight-or-flight response, CaM variants that perturb KCNQ1 function  
6 (e.g. CaM E141G, Q136P) are more likely to derive therapeutic benefits from  $\beta$ -adrenergic  
7 blockade. This study therefore provides data that may inform personalized medical therapy (e.g.  
8  $\beta$ -blocker) in CaM variant carriers.

### 9 **CaM variant interaction with KCNQ1 in relation to other CaM targets**

10 In this study, several CaM variants do not alter baseline KCNQ1 gating or membrane  
11 trafficking, despite binding KCNQ1 with WT-like affinity. Although these variants likely do not  
12 impact the cardiac action potential by directly modulating KCNQ1 current, KCNQ1 may still play  
13 a role by altering the variants interaction with other CaM regulatory targets. The pool of free or  
14 unbound CaM in cardiomyocytes has been estimated to be severely limited at 50-75 nM  
15 representing 1% of total CaM<sup>60</sup>. The low supply of free CaM may lead to redistribution of CaM  
16 variants on distinct CaM targets depending on relative affinities. For example, KCNQ1 may act as  
17 a protective “sink” by sequestering CaM variants that bind KCNQ1 with high affinity without  
18 affecting  $I_{Ks}$  current, effectively chelating these variants from affecting alternate targets.

19 On the other hand, CaM variants with minimal binding affinity to KCNQ1 (e.g. CaM  
20 G114W) may promote CaM G114W to alternate targets and result in surprising findings. CaM  
21 binding to KCNQ1 is required for channel assembly and membrane trafficking<sup>5,6</sup>. Accordingly,  
22 CaM G114W is not expected to cause KCNQ1 current dysfunction, as all KCNQ1 expressed on  
23 the cardiomyocyte membrane are likely associated with CaM WT. Consistent with this hypothesis,  
24 no ionic current abnormalities were detected when KCNQ1 or  $I_{Ks}$  were co-expressed with CaM  
25 G114W (Fig. 6C). Still, we found that co-expression of KCNQ1 and CaM G114W increased  
26 KCNQ1 trafficking efficiency in CHO cells (Fig. 6B and Fig. 3C). We attribute this observation

1 to CaM G114W binding to alternate targets within the cell, thereby freeing more endogenous CaM  
2 WT to bind KCNQ1. CaM G114W has been shown to feature moderately reduced, but not  
3 abolished, binding to the Cav1.2 and RyR2 as well as impairing Cav1.2 Ca<sup>2+</sup>-dependent  
4 inactivation<sup>27</sup>. It is possible that the lack of binding between KCNQ1 and CaM G114W lead to  
5 enhanced CaM G114W pre-association to Cav1.2 and RyR2, thereby exacerbating their  
6 dysfunction. Another intriguing possibility is that distinct CaM genes may target their  
7 corresponding mRNA to distinct cardiomyocyte cellular regions, with studies suggesting *Calm2*  
8 mRNA is more favored to spatially cluster with *Ryr2* mRNA<sup>61</sup>. Spatial distribution of CaM WT  
9 vs. variants within cardiomyocytes to distinct CaM targets may add yet another layer of complexity  
10 for how CaM variants affect KCNQ1 membrane expression and function. Taken together, the CaM  
11 G114W variant highlights the potential complexity of considering distinct CaM targets within the  
12 cell, as well as the importance of employing multiple readouts (e.g. binding, membrane trafficking,  
13 and functional electrophysiology) to elucidate CaM variant effect.

14 Taken together, our study furnishes extensive characterization of CaM variants interaction  
15 and effect on KCNQ1 channels, delineating the CaM variants that cause KCNQ1 dysfunction to  
16 play a role in arrhythmogenesis. This study demonstrates that KCNQ1 dysfunction is a critical  
17 component of CaM-induced arrhythmia. The multi-pronged approach employed in this study of  
18 measuring binding, surface expression, and channel function can be readily applied to other CaM  
19 binding targets. In all, our findings provide key results toward elucidating calmodulinopathy  
20 mechanism that integrates numerous CaM regulatory targets.

21

## 1 **Acknowledgements**

2 This work was supported by grants NIH R01 HL136553 and R01 NS092570 (J.R.S.), NIH R01  
3 HL155398 (J.C.), NIH F30 HL151042 (P.W.K.), and US-Israel Binational Science Foundation  
4 research grant 2019159 (J.C.).

## 5 **Author Contributions**

6 P.W.K., J.C., and J.R.S., conceptualized and designed research; P.W.K., L.W., P.A., J.S., M.M.,  
7 C.A., D.S., N.S., A.B., performed research and acquired data, P.W.K, L.W., N.S., analyzed data;  
8 J.R.S., J.C., funding acquisition; P.W.K., L.W. made figures and wrote original draft; and all  
9 authors revised manuscript.

## 10 **Competing Interests**

11 Jingyi Shi and Jianmin Cui are cofounders of a startup company VivoCor LLC, which is targeting  
12  $I_{Ks}$  for the treatment of cardiac arrhythmia.

## 13 **Data and materials availability**

14 All data required to evaluate the conclusions within this manuscript are presented in the main text  
15 and the supplements.

## 1 **Materials and Methods**

### 2 **Molecular biology, cell culture, and transfection**

3 Point mutations were made in KCNQ1 channel and CaM utilizing overlap extension and  
4 high-fidelity PCR. DNA sequencing confirmed the presence of all mutants made in the final DNA  
5 products. For FRET experiments, CHO cells were cultured in 35-mm dishes and transfected with  
6 with jetPRIME or jetOPTIMUS reagents (Polyplus transfection, New York NY) with 4:2 DNA  
7 mass-ratio for KCNQ1:CaM corresponding to 0.4:0.2  $\mu\text{g}$  of DNA.

### 8 **Electrophysiology and FRET solutions**

9 For all solutions, concentrations are in milli-molar (mM) unless otherwise indicated.  
10 *Electrophysiology solutions.* ND96 solution: NaCl 96, KCl 2, CaCl<sub>2</sub> 1.8, MgCl<sub>2</sub> 1, HEPES 5, Na  
11 pyruvate 2.5, Penicillin-streptomycin 100 U/mL. pH adjusted to 7.6 with NaOH. OR2 Solution:  
12 NaCl 82.5, KCl 2.5, MgCl<sub>2</sub> 1, HEPES 5. pH to 7.6 with NaOH.

13 *FRET solutions.* Hank's balanced salt solution (HBSS, calcium, magnesium, no phenol  
14 red): CaCl<sub>2</sub> 1.26, MgCl<sub>2</sub> 0.49, MgSO<sub>4</sub> 0.41, KCl 5.33, KH<sub>2</sub>PO<sub>4</sub> 0.44, NaHCO<sub>3</sub> 4.17, NaCl 137.93,  
15 Na<sub>2</sub>HPO<sub>4</sub> 0.34, D-glucose 5.56. HBSS was purchased from Thermo Fisher Scientific (Waltham,  
16 MA). High Ca<sup>2+</sup> (10Ca<sup>2+</sup>) solution: NaCl 138, KCl 4, MgCl<sub>2</sub> 1, CaCl<sub>2</sub> 10, NaHPO<sub>4</sub> 0.2, HEPES  
17 10, D-glucose 5. pH to 7.4 with NaOH.

### 18 **FRET imaging**

19 For all FRET experiments, same-batch transfection of appropriate donor only (e.g.  
20 Cerulean-tagged CaM), acceptor only (e.g. Venus-tagged KCNQ1), and spurious FRET constructs  
21 (e.g. Venus-tagged KCNQ1 and untagged Cerulean) were also performed and imaged. When  
22 FRET data between mutant constructs were collected (e.g. Venus-tagged KCNQ1 and Cerulean-  
23 tagged CaM-mutant), the WT FRET pair was also transfected for same-day comparison. Prior to  
24 imaging, each plate was washed 3 times with PBS solution and incubated in HBSS(+ / +) solution  
25 (Thermo Fisher Scientific, Waltham MA) at 37°C for imaging. For experiments involving



1 elevating intracellular  $\text{Ca}^{2+}$ , cells were washed and incubated in  $10\text{Ca}^{2+}$  solution with freshly mixed  
2  $4\ \mu\text{M}$  ionomycin for at least 15 minutes prior to imaging.

3 FRET data collection was performed on a Nikon Eclipse Ti-U inverted microscope. Our  
4 system design functioned analogously to the “3-cube” FRET technique in which 3 fluorescence  
5 channels were acquired<sup>47,62</sup>, but we implemented multiple bandpass filters, optical splitter, and  
6 electronically triggered light source and camera to acquire the 3 channels without using multiple  
7 filter cubes. For the Cerulean-Venus or CFP-YFP FRET pair, cells were excited with the Spectra  
8 III light engine (Lumencor, Beaverton OR) coupled to the microscope through a liquid light guide  
9 with the CFP (integrated bandpass filter: 440/20 nm) and YFP (integrated bandpass filter: 510/25  
10 nm) lines. The microscope was outfitted with a triple-band dichroic beamsplitter (FF459/526/596-  
11 Di01, Semrock, Rochester NY) and a triple-band emitter (FF01-475/543/702-25, Semrock,  
12 Rochester NY). The microscope’s filter cube allowed both CFP and YFP lines from Spectra III to  
13 excite the cells, and simultaneously collected fluorescence emission output from both CFP and  
14 YFP at 475 and 543 nm. The fluorescence output was passed into an OptoSplit II Bypass emission  
15 image splitter (Cairn Research, Faversham, UK) fitted with a 505nm beamsplitter (T505lpxr,  
16 Chroma Color Corporation, McHenry IL), 480nm emission filter (ET480/40m, Chroma Color  
17 Corporation, McHenry IL), and 545nm emission filter (ET545/40m, Chroma Color Corporation,  
18 McHenry IL). The OptoSplit II Bypass effectively separated the fluorescence output into distinct  
19 CFP and YFP emission bands. The two bands were directed toward an Andor iXon EMCCD  
20 camera (Andor Technology, Belfast, UK) with each band utilizing one-half of the camera sensor  
21 for signal detection driven by the Andor Solis software (Andor Technology, Belfast, UK). The two  
22 halves of the camera sensor therefore captured both the CFP and YFP emissions simultaneously.  
23 The Spectra III light engine and the Andor iXon EMCCD camera were connected to a Digidata  
24 1440A low-noise data acquisition system (Molecular Devices, San Jose CA) that synchronized  
25 both devices by TTL. The Digidata was driven by pClamp software (Molecular Devices, San Jose  
26 CA).

1           During FRET imaging, the camera was used to locate fluorescence cells for imaging  
2 through a 20X objective (Nikon CFI S Plan Fluor 20X/0.45). Once an appropriate field of view  
3 was found, the Digidata electronically triggered the Spectra III to turn on the CFP and the YFP  
4 lines one after the other, during which the Digidata also triggered the camera to acquire two  
5 images. The first image corresponded to excitation by the CFP line only, while the second image  
6 corresponded to excitation by the YFP line only. As the Optosplit II ensured the camera  
7 simultaneously captured CFP and YFP emission, our protocol enabled collection of three  
8 fluorescence channels: (1) CFP excitation and CFP emission (donor channel), (2) CFP excitation  
9 and YFP emission (FRET channel), and (3) YFP excitation and YFP emission (acceptor channel).

10           After FRET image acquisition, the images were analyzed and binding curves fitted between  
11 KCNQ1 and CaM with MATLAB as detailed in extended methods.

## 12 ***Xenopus* oocytes harvesting and two-electrode voltage clamp**

13           *Xenopus laevis* (frogs) were housed in the professional animal facility within the  
14 Washington University Danforth campus and oocytes harvested from adult female by laparotomy.  
15 All procedures were approved by the Washington University Institutional Animal Care and Use  
16 Committee Office. Each oocyte was injected with 10-20 ng of cRNA encoding for KCNQ1,  
17 KCNE1, or CaM with a Drummond Nanoject (Broomall, PA). For experiments involving multiple  
18 constructs, the cRNA were co-injected at 3:1 (KCNQ1:KCNE1), 1:1 (KCNQ1:CaM), and 3:1:4  
19 (KCNQ1:KCNE1:CaM) mass ratio. Injected oocytes were individually incubated in ND96 in 48-  
20 well plates at 18 °C for 2 to 6 days prior to TEVC recording.

## 21 **KCNQ1 Membrane Trafficking Efficiency Assay**

22           The trafficking efficiency assay experiments were performed with a Zeiss LSM 880  
23 Airyscan Two-Photon confocal microscope located within the Washington University Center for  
24 Cellular Imaging (WUCCI) on the Washington University Medical School campus. CHO cells  
25 were transfected in a similar manner to samples prepared for FRET imaging. The cells were plated

1 on 35 mm plates with a small glass-bottom section used for oil immersion imaging. CHO cells  
2 were co-transfected with the CaM variant of interest and KCNQ1-psWT-HA-Cer (Fig. 3A). In  
3 each experiment, the Alexa-Fluor 594 were conjugated to the plasma membrane-bound KCNQ1  
4 via a secondary antibody targeted to the HA tag within the S1-S2 linker. During staining, cells  
5 were fixed but not permeabilized through PFA fixation to minimize intra-cellular labeling. To  
6 prevent non-specific labeling of Alexa-594, cells were incubated overnight with BSA at 4°C after  
7 fixation. As all KCNQ1 subunits are labeled with a Cerulean probe, the fluorescence intensity in  
8 the Cerulean channel is proportional to the total number of KCNQ1 in each cell. On the other hand,  
9 the fluorescence intensity of the Alexa-594 channel is proportional to the number of plasma  
10 membrane-bound KCNQ1, as the HA-tag labeling site is within the extracellular S1-S2 linker. The  
11 apparent trafficking efficiency of KCNQ1 was computed for each cell with the equation

$$12 \quad \text{Apparent Trafficking Efficiency} = (I_{\text{Alex-594}}) / (I_{\text{Cerulean}})$$

13 Where  $I_{\text{Alex-594}}$  and  $I_{\text{Cerulean}}$  are the fluorescence intensities of the Alexa-694 and Cerulean channels,  
14 respectively. All measurements were taken at the same PMT and laser intensity levels. Statistical  
15 results are ANOVA tests compared to the WT CaM trafficking efficiency.

## 16 **Electrophysiology data analysis**

17 Data analysis performed with MATLAB (MathWorks, MA). Conductance–voltage ( $GV$ )  
18 curves were quantified by fitting a single Boltzmann function. The instantaneous tail currents  
19 following test pulses were normalized to the maximum tail current and fitted with the equation

$$20 \quad G(V) = \left(1 + \exp\left(-V_s \cdot [V - V_{1/2}]\right)\right)^{-1}$$

21 where  $V$  is the test voltage,  $V_s$  is the slope factor controlling the steepness of the Boltzmann  
22 equation, and  $V_{1/2}$  is the half-activation voltage.  $V_s$  is further related to  $RT/zF$ , where  $R$  is the gas  
23 constant,  $T$  is the absolute temperature,  $z$  is the equivalent valence, and  $F$  is the Faraday constant.

24 KCNQ1 current activation kinetics were quantified by fitting the 4-sec test-pulse currents  
25 with a biexponential function in the general form of

1 
$$I(t) = A_{\text{fast}} \left( 1 - \exp \left( -\frac{t - t_{\text{lag}}}{\tau_{\text{fast}}} \right) \right) + A_{\text{slow}} \left( 1 - \exp \left( -\frac{t - t_{\text{lag}}}{\tau_{\text{slow}}} \right) \right) + C_{\text{offset}}$$

2 with one fast component and one slow component. Each exponential is characterized by a time  
3 constant  $\tau$  as well as a steady-state amplitude  $A$ . The variable  $t_{\text{lag}}$  corresponds to the time lag to  
4 begin kinetics fitting. Current data between the start of the test pulse and  $t_{\text{lag}}$  (i.e.  $I(0 < t < t_{\text{lag}})$ )  
5 were not included in the fit. Kinetics fitting of  $I_{K_s}$  current activation used a similar equation, but  
6 only a single exponential component was used.

7 For fitting, each current trace was baseline corrected with the mean current at the holding  
8 potential (-80 mV) for each trace. With KCNQ1 specifically, as the slow component contained  
9 more data points than the fast component, the fast current component was first estimated by fitting  
10 the first 0.5 second after the test pulse. A second overall fit was then applied to the entire 4-second  
11 test pulse current, with the fast time constant constrained to  $\pm 25\%$  of the first fit. For KCNQ1  
12 current activation kinetics, the fraction of the total current carried by the fast component was  
13 calculated with the following equation

14 
$$f_{\text{fast}} = \frac{A_{\text{fast}}}{A_{\text{fast}} + A_{\text{slow}}}$$

15 Because KCNQ1 current activates without very significant lag,  $t_{\text{lag}}$  variable was set to zero.  
16 On the other hand,  $t_{\text{lag}}$  was a free parameter in  $I_{K_s}$  kinetics fitting.  $t_{\text{lag}}$  was determined automatically  
17 by linear extrapolation. First, the derivative of the current trace was estimated and smoothed by  
18 the “diff” and “smooth” functions on MATLAB, respectively. The value of the maximum rate of  
19 change ( $m_{\text{rate,max}}$ ) and the time point at which maximum rate of change occurred ( $t_{\text{rate,max}}$ ) within  
20 the first 0.4 second was then determined. Using these two parameters, a tangent line was drawn on  
21 the current trace at  $t = t_{\text{rate,max}}$  with slope  $m_{\text{rate,max}}$ . Finally,  $t_{\text{lag}}$  was determined by linear  
22 extrapolating the tangent line back to the time point where the line intersects with the instantaneous  
23 current at beginning of the test pulse using the equation,

24 
$$t_{\text{lag}} = t_{\text{rate,max}} - \left( \frac{I(t = t_{\text{rate,max}}) - I(t = 0)}{m_{\text{rate,max}}} \right)$$

25

1 **Figures**

2

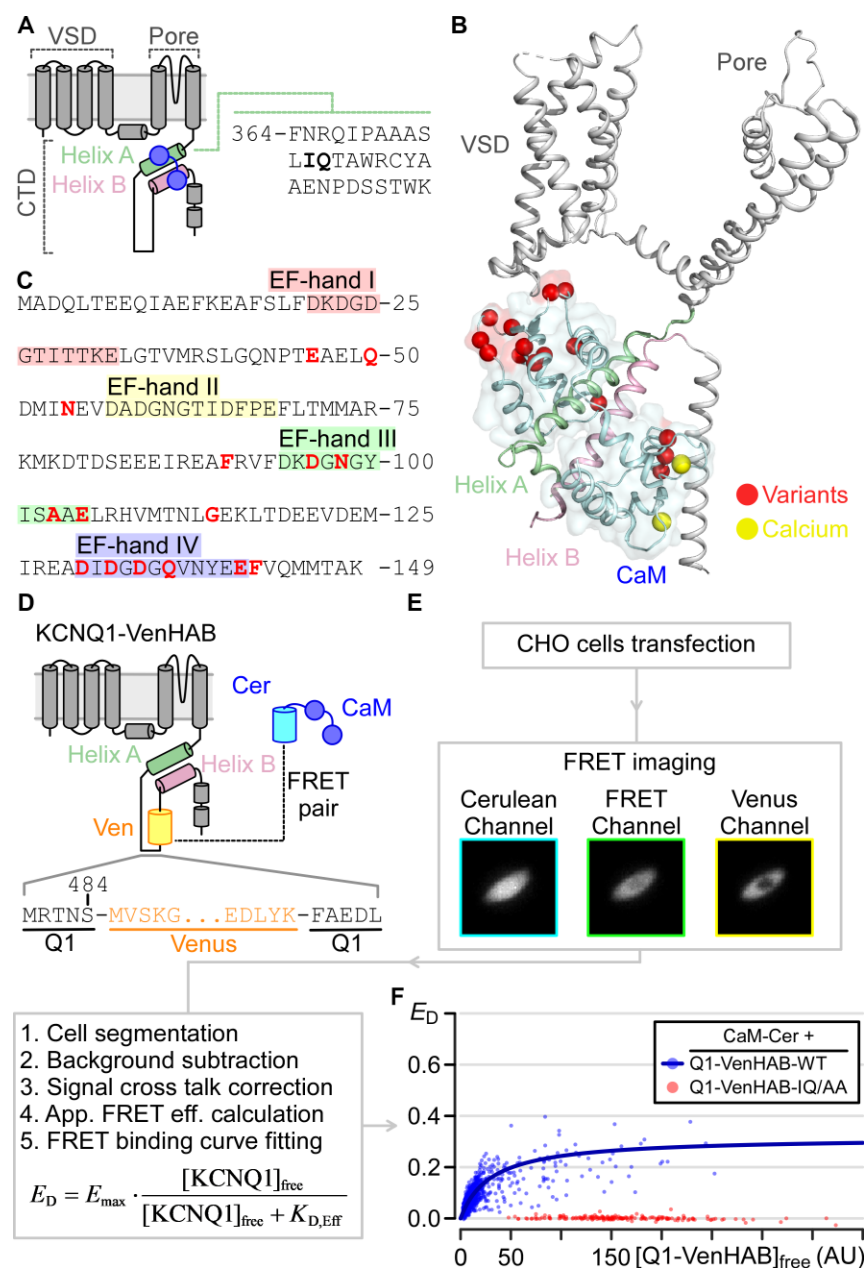

3

4 **Figure 1. A FRET-based live-cell assay to probe CaM interaction with full-length KCNQ1.**

5 (A) KCNQ1 topology and CaM interacting regions. CaM binds Helix A (HA) and Helix B (HB)

6 within the C-terminus domain (CTD) of KCNQ1. VSD is voltage-sensing domain. The sequence

7 for KCNQ1 helix A is shown, with the key CaM-interacting “IQ” residues bolded. (B) Cryo-EM

8 structural depiction (PDB: 6UZZ) of the human KCNQ1-CaM complex with red spheres

9 indicating positions with known CaM variants. Yellow spheres are calcium ions. (C) Sequence of

1 CaM. Each EF hand (colored highlights) can coordinate one  $\text{Ca}^{2+}$  ion. Red residues correspond to  
2 positions with known CaM variants. **(D)** Cartoon illustration of the KCNQ1-VenHAB and CaM-  
3 Cerulean FRET pair. The venus insertion site is shown. **(E)** FRET workflow to detect CaM  
4 interaction with full-length KCNQ1 in live cells. **(F)** Fitted FRET binding curves of cerulean-  
5 tagged CaM with KCNQ1-VenHAB-WT (blue,  $n = 1768$ ) and KCNQ1-VenHAB-IQ/AA (red,  $n$   
6  $= 217$ ). Each dot is one cell. For WT, best-fit  $E_{\text{Max}} = 0.317$  and  $K_{\text{D,Eff}} = 30.2$  AU with 95% CI =  
7 [23.9, 36.7]. For IQ/AA, no fitting was performed because of the lack of rise in FRET signal.  
8

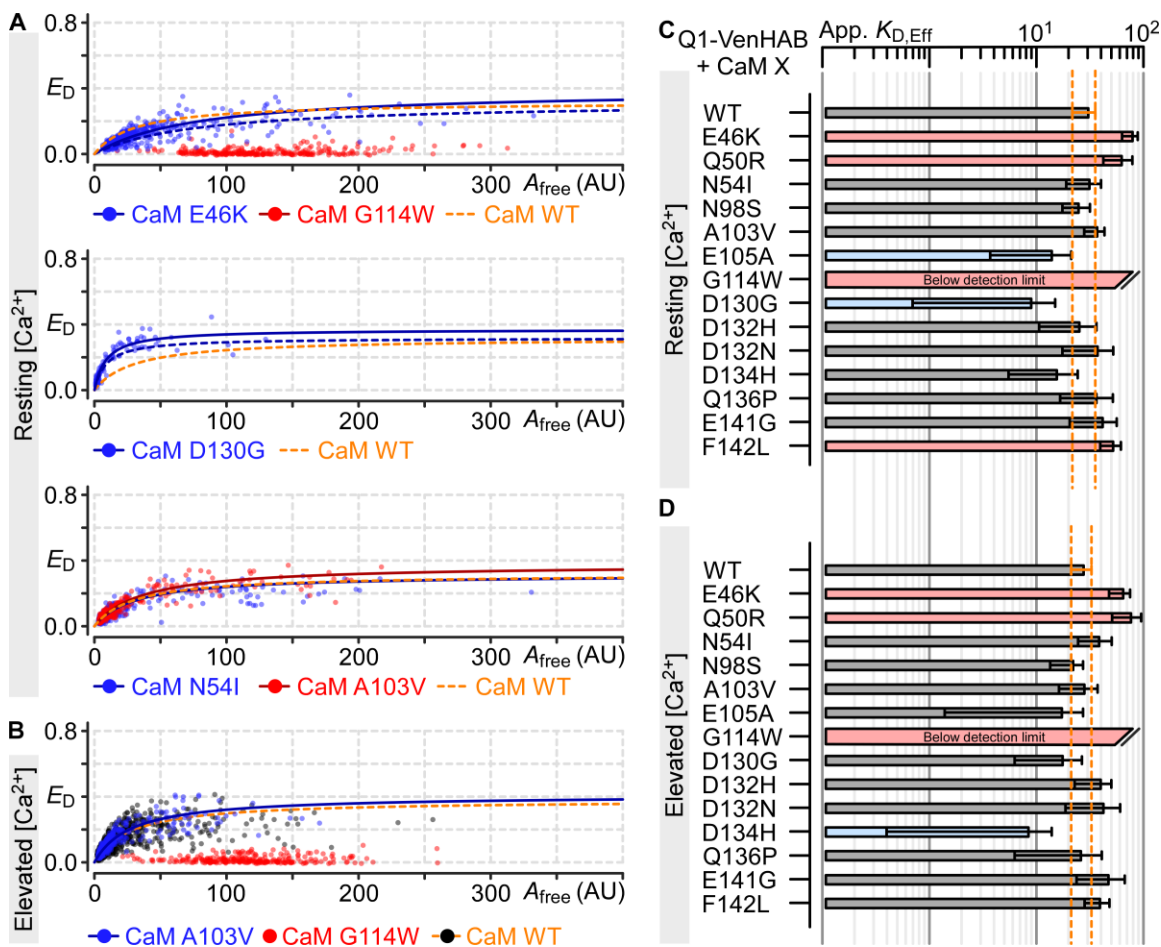

1

2 **Figure 2. Arrhythmia-associated CaM variants binding to full-length KCNQ1 in live cells.**

3 (A) FRET binding curves measured between KCNQ1-VenHAB and Cerulean-tagged CaM

4 variants as labeled under resting  $\text{Ca}^{2+}$  conditions. Each dot is one cell. Dotted blue lines are the

5 FRET binding curves with  $E_{\text{Max}}$  normalized to the same level as WT for  $K_{D,\text{Eff}}$  comparison. Top,

6 middle, and bottom plots illustrate variants exhibiting decreased, increased, and similar binding

7 affinity to KCNQ1-VenHAB, respectively.  $A_{\text{free}}$  corresponds to estimated free concentration of

8 KCNQ1-VenHAB.  $n = 708$  (E46K), 291 (G114W), 244 (D130G), 623 (N54I), 686 (A103V). (B)

9 Format as in panel A, but showing FRET binding curves measured under elevated  $\text{Ca}^{2+}$  conditions.

10  $n = 292$  (G114W), 622 (A103V). (C-D) Bar plot summary for fitted  $K_{D,\text{Eff}}$  between KCNQ1-

11 VenHAB and the indicated CaM variant under resting or elevated  $\text{Ca}^{2+}$  conditions. Red and blue

12 bars indicate CaM variants with significantly different  $K_{D,\text{Eff}}$  compared to WT. Error bars are 95%

- 1 confidence interval. Orange dotted lines denote 95% CI for WT. See Supplementary Tables 1 and
- 2 2 for all fitted binding curve parameters.



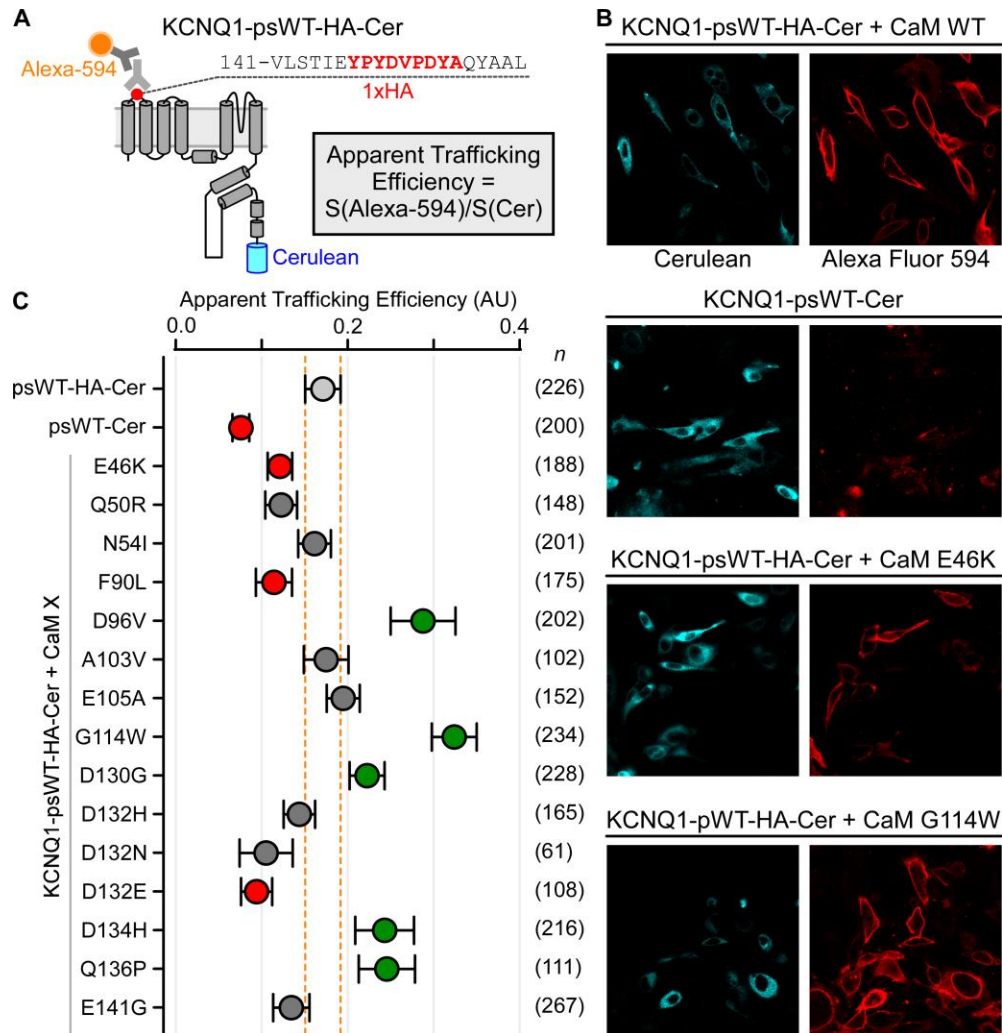

1

2 **Figure 3. Effect of CaM variants on KCNQ1 membrane trafficking.** (A) Cartoon illustration

3 of KCNQ1 construct used for membrane trafficking assay (KCNQ1-psWT-HA-Cer). Cerulean

4 fluorophore and HA tag were inserted into KCNQ1 as diagrammed. Total KCNQ1 expressed

5 within the cell correlates with Cerulean signal, while membrane-trafficked KCNQ1 was estimated

6 with Alexa Fluor 594 signal. An apparent trafficking efficiency for each cell was derived by

7 dividing the Alexa Fluor 594 signal to that of Cerulean on confocal microscopy. (B) Confocal

8 microscopy images of KCNQ1-psWT-HA-Cer co-expressed with CaM, left cyan and right red

9 images show Cerulean and Alexa Fluor 594 signals, respectively. KCNQ1-psWT-Cer is a

10 construct with a cerulean fused to the carboxy-terminus but no HA tag in the S1-S2 linker. (C)

11 Summary data for apparent trafficking efficiency for KCNQ1 co-expressed with different CaM

1 variants. Each dot indicates the mean and error bars represent 95% confidence interval. Orange  
2 dashed lines denote 95% confidence interval for WT control. *n* indicates number of cells analyzed  
3 for the corresponding CaM variant. Green and red denote statistically significant increased and  
4 decreased membrane trafficking when compared to WT control, respectively. Statistical  
5 significance calculated with one-way ANOVA followed by Dunnett's test. See Supplementary  
6 Table 3 for all parameters.  
7

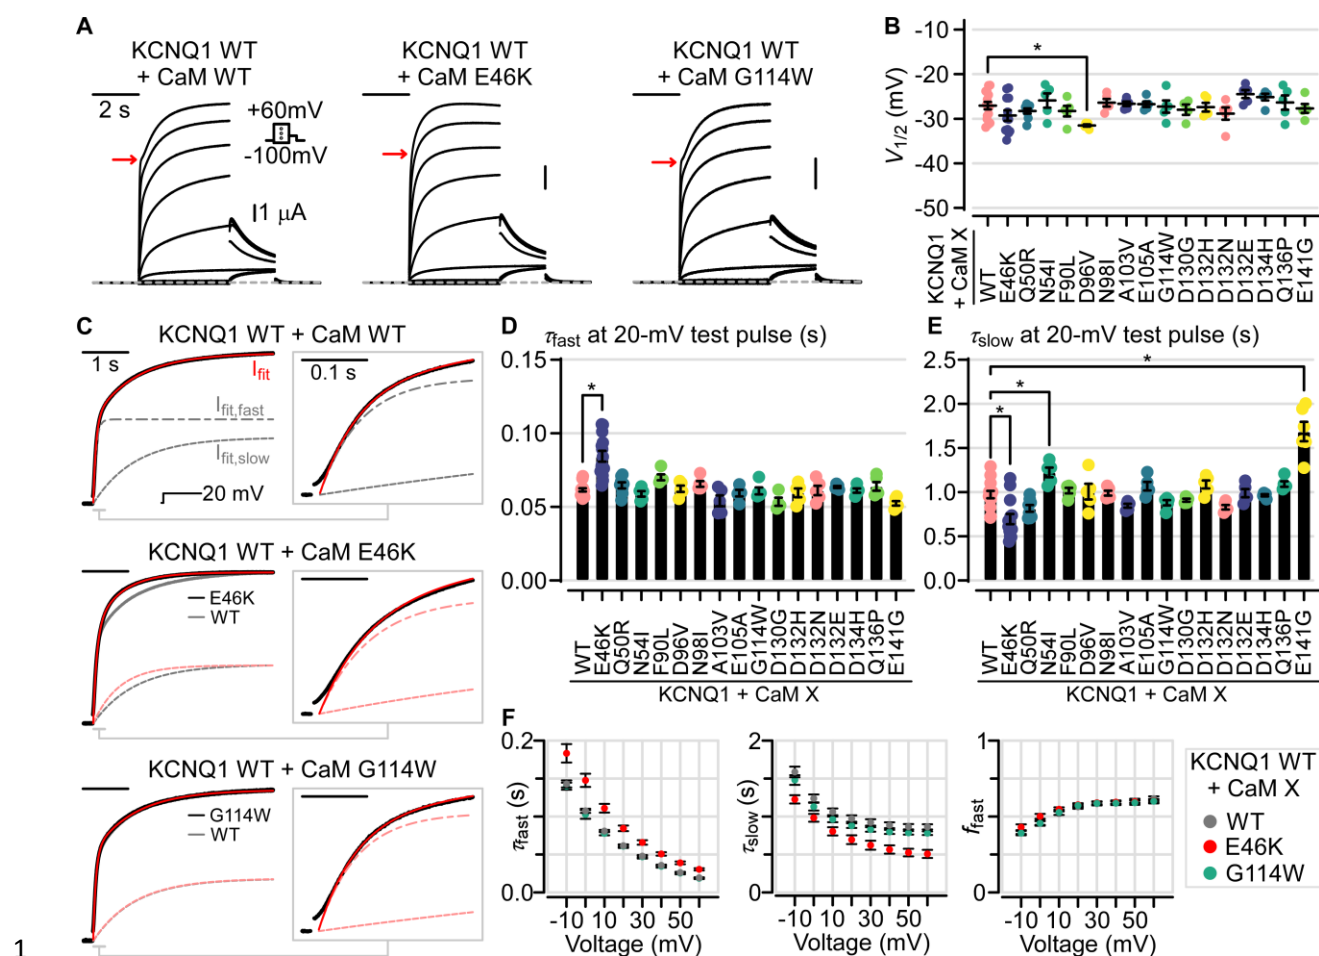

1  
2 **Figure 4. Arrhythmia-associated CaM variants effect on baseline KCNQ1 steady-state**  
3 **activation and activation kinetics.** (A) Exemplar currents recorded from KCNQ1 WT co-  
4 expressed with either CaM WT or CaM variants. (B) Summary half-activation voltage ( $V_{1/2}$ ) of the  
5 conductance-voltage (G-V) curves for KCNQ1 when co-expressed with various CaM variants. (C)  
6 Exemplar bi-exponential fitting for KCNQ1 activation kinetics. (D-E) Summary bar plots for fitted  
7 fast and slow time constants for KCNQ1 co-expressed with CaM variants when tested at 20 mV.  
8 (F) Bi-exponential fitting parameters for KCNQ1 WT co-expressed with CaM WT, E46K, and  
9 G114W as a function of voltage. All error bars are SEM.

10

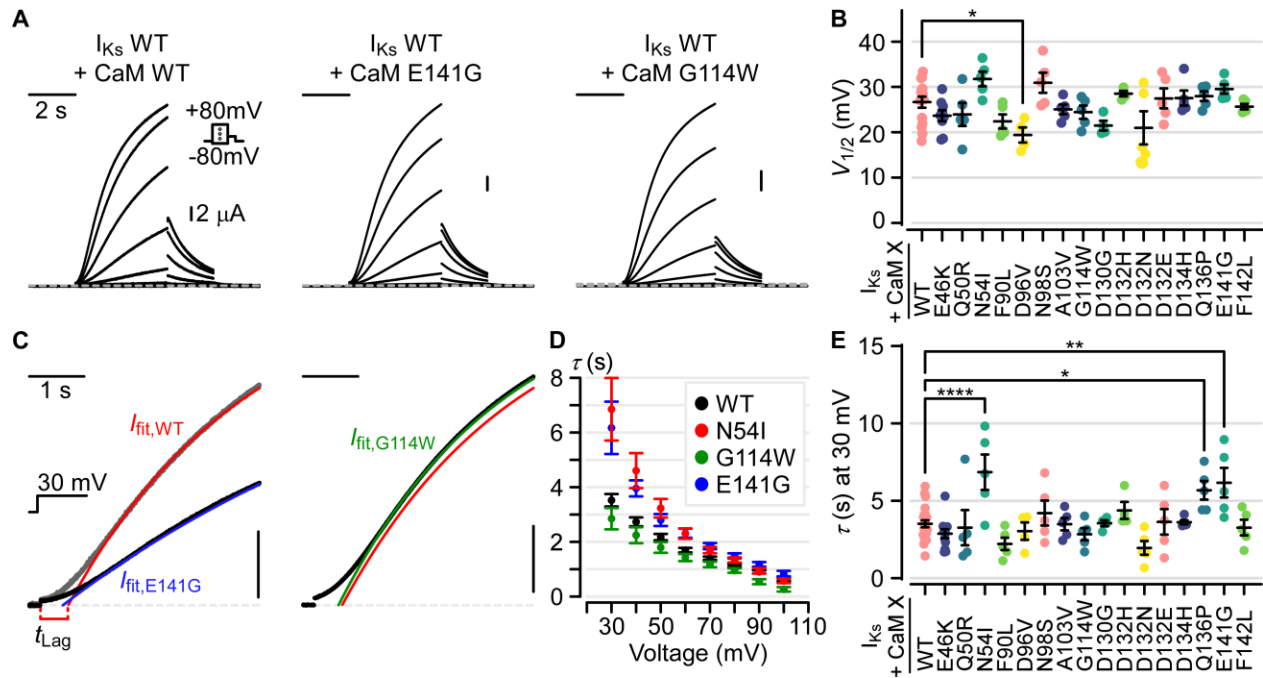

1  
2 **Figure 5. Arrhythmia-associated CaM variants effect on  $I_{Ks}$  (KCNQ1+KCNE1) steady-state**  
3 **activation and activation kinetics. (A)** Exemplar  $I_{Ks}$  recordings from *Xenopus* oocytes when co-  
4 expressed with CaM WT, E141G, or G114W. **(B)** Summary activation  $V_{1/2}$  fitted in G-V curves  
5 for  $I_{Ks}$  co-expressed with CaM variants. Statistical significance determined by one-way ANOVA  
6 and Dunnett's test. **(C)** Exemplar activation kinetics fitting for  $I_{Ks}$  co-expressed with CaM variants  
7 when depolarized to 30 mV. Currents were fitted to the equation  $I(t) = A \cdot \exp(-(t - t_{Lag}) / \tau)$ , with  
8 points prior to  $t_{Lag}$  excluded from the fitting procedure. Plotted ionic currents were normalized to  
9 the fitted  $A$  for comparison. Vertical scale bars show 25% of normalized current. Left panel: gray  
10 and black represent normalized ionic current for  $I_{Ks}$  co-expressed with CaM WT and E141G,  
11 respectively. Right panel: black and green indicate normalized ionic current and kinetics fit for  $I_{Ks}$   
12 co-expressed with CaM E141G. Red line shows identical WT fit seen in the left panel. **(D)** Fitted  
13 activation time constant for  $I_{Ks}$  co-expressed with CaM WT, N54I, G114W, and E141G as a  
14 function of step voltage from 30 mV to 100 mV. Error bars are SEM. **(E)** Summary of fitted  
15 activation time constant for  $I_{Ks}$  co-expressed with CaM WT or variants when depolarized to 30  
16 mV. Significance was determined by one-way ANOVA followed by Dunnett's test.

17

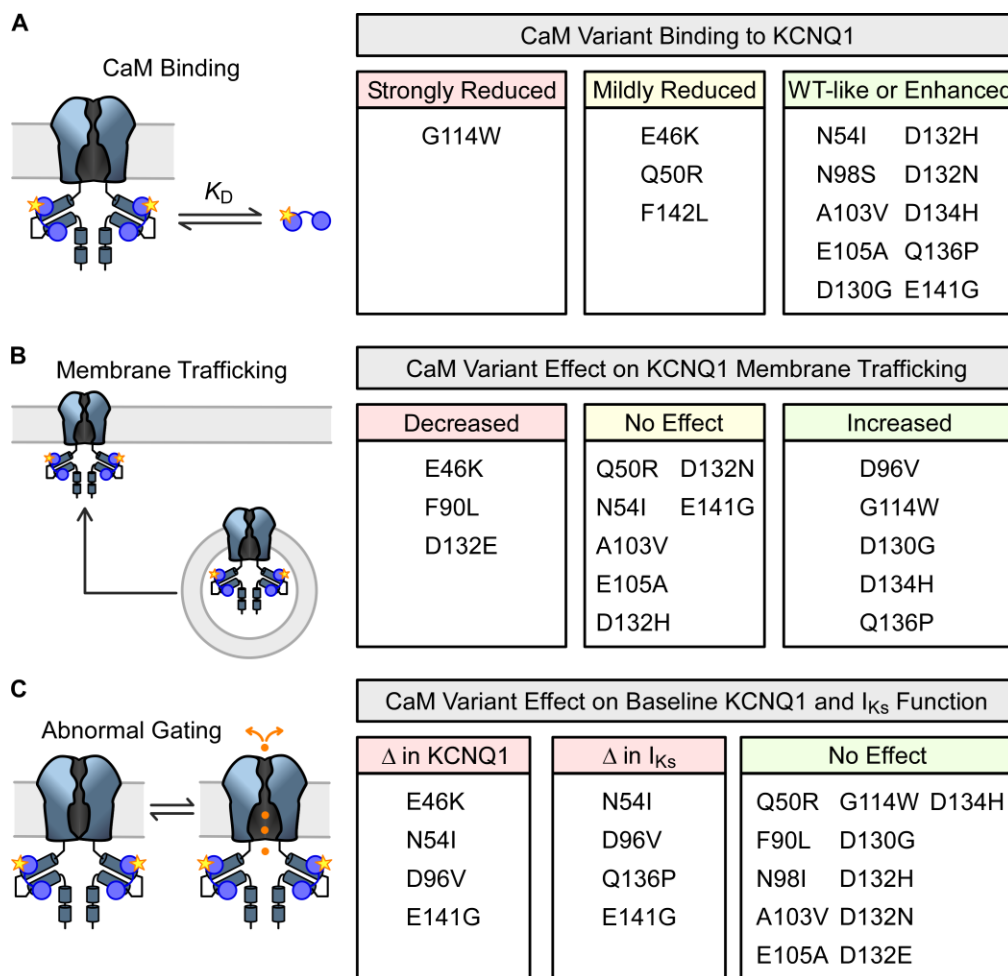

1

2 **Figure 6. Summary of the effect of CaM variants on KCNQ1.** Classification of CaM variants

3 effect on (A) KCNQ1 binding, (B) KCNQ1 membrane trafficking, and (C) KCNQ1 function.

4

## 1 References

- 2 1. Ben-Johny M, Yue DT. Calmodulin regulation (calmodulation) of voltage-gated calcium  
3 channels. *The Journal of general physiology*. 2014;143:679-692. doi: 10.1085/jgp.201311153
- 4 2. Meissner G. The structural basis of ryanodine receptor ion channel function. *The Journal of*  
5 *general physiology*. 2017;149:1065-1089. doi: 10.1085/jgp.201711878
- 6 3. Sorensen AB, Søndergaard MT, Overgaard MT. Calmodulin in a heartbeat. *The FEBS journal*.  
7 2013;280:5511-5532. doi: 10.1111/febs.12337
- 8 4. Van Petegem F. Ryanodine receptors: structure and function. *The Journal of biological*  
9 *chemistry*. 2012;287:31624-31632. doi: 10.1074/jbc.R112.349068
- 10 5. Shamgar L, Ma L, Schmitt N, Haitin Y, Peretz A, Wiener R, Hirsch J, Pongs O, Attali B.  
11 Calmodulin is essential for cardiac IKS channel gating and assembly: impaired function in long-  
12 QT mutations. *Circ Res*. 2006;98:1055-1063. doi: 10.1161/01.RES.0000218979.40770.69
- 13 6. Ghosh S, Nunziato DA, Pitt GS. KCNQ1 assembly and function is blocked by long-QT syndrome  
14 mutations that disrupt interaction with calmodulin. *Circ Res*. 2006;98:1048-1054. doi:  
15 10.1161/01.RES.0000218863.44140.f2
- 16 7. Ben-Johny M, Yang PS, Niu J, Yang W, Joshi-Mukherjee R, Yue DT. Conservation of  
17 Ca<sup>2+</sup>/calmodulin regulation across Na and Ca<sup>2+</sup> channels. *Cell*. 2014;157:1657-1670. doi:  
18 10.1016/j.cell.2014.04.035
- 19 8. Adams PJ, Ben-Johny M, Dick IE, Inoue T, Yue DT. Apocalmodulin itself promotes ion channel  
20 opening and Ca(2+) regulation. *Cell*. 2014;159:608-622. doi: 10.1016/j.cell.2014.09.047
- 21 9. Kang PW, Chakouri N, Diaz J, Tomaselli GF, Yue DT, Ben-Johny M. Elementary mechanisms of  
22 calmodulin regulation of Na(V)1.5 producing divergent arrhythmogenic phenotypes. *Proc Natl*  
23 *Acad Sci U S A*. 2021;118. doi: 10.1073/pnas.2025085118
- 24 10. Kang PW, Westerlund AM, Shi J, White KM, Dou AK, Cui AH, Silva JR, Delemotte L, Cui J.  
25 Calmodulin acts as a state-dependent switch to control a cardiac potassium channel opening.  
26 *Science advances*. 2020;6. doi: 10.1126/sciadv.abd6798
- 27 11. Yan H, Wang C, Marx SO, Pitt GS. Calmodulin limits pathogenic Na<sup>+</sup> channel persistent current.  
28 *The Journal of general physiology*. 2017;149:277-293. doi: 10.1085/jgp.201611721
- 29 12. Urrutia J, Aguado A, Muguruza-Montero A, Núñez E, Malo C, Casis O, Villarroel A. The  
30 Crossroad of Ion Channels and Calmodulin in Disease. *International journal of molecular*  
31 *sciences*. 2019;20. doi: 10.3390/ijms20020400
- 32 13. Bauer R, Timothy KW, Golden A. Update on the Molecular Genetics of Timothy Syndrome.  
33 *Frontiers in pediatrics*. 2021;9:668546. doi: 10.3389/fped.2021.668546
- 34 14. Hussey JW, Limpitikul WB, Dick IE. Calmodulin Mutations in Human Disease. *Channels*  
35 *(Austin, Tex)*. 2023;17:2165278. doi: 10.1080/19336950.2023.2165278
- 36 15. Friedberg F, Rhoads AR. Evolutionary aspects of calmodulin. *IUBMB life*. 2001;51:215-221. doi:  
37 10.1080/152165401753311753
- 38 16. Crotti L, Johnson CN, Graf E, De Ferrari GM, Cuneo BF, Ovadia M, Papagiannis J, Feldkamp  
39 MD, Rathi SG, Kunic JD, et al. Calmodulin mutations associated with recurrent cardiac arrest in  
40 infants. *Circulation*. 2013;127:1009-1017. doi: 10.1161/circulationaha.112.001216
- 41 17. Crotti L, Spazzolini C, Tester DJ, Ghidoni A, Baruteau AE, Beckmann BM, Behr ER, Bennett JS,  
42 Bezzina CR, Bhuiyan ZA, et al. Calmodulin mutations and life-threatening cardiac arrhythmias:  
43 insights from the International Calmodulinopathy Registry. *European heart journal*.  
44 2019;40:2964-2975. doi: 10.1093/eurheartj/ehz311
- 45 18. Nyegaard M, Overgaard MT, Søndergaard MT, Vranas M, Behr ER, Hildebrandt LL, Lund J,  
46 Hedley PL, Camm AJ, Wettrell G, et al. Mutations in calmodulin cause ventricular tachycardia  
47 and sudden cardiac death. *American journal of human genetics*. 2012;91:703-712. doi:  
48 10.1016/j.ajhg.2012.08.015
- 49 19. Jensen HH, Brohus M, Nyegaard M, Overgaard MT. Human Calmodulin Mutations. *Frontiers in*  
50 *Molecular Neuroscience*. 2018;11. doi: 10.3389/fnmol.2018.00396



- 1 20. Chazin WJ, Johnson CN. Calmodulin Mutations Associated with Heart Arrhythmia: A Status  
2 Report. *International journal of molecular sciences*. 2020;21. doi: 10.3390/ijms21041418
- 3 21. Makita N, Yagihara N, Crotti L, Johnson CN, Beckmann BM, Roh MS, Shigemizu D, Lichtner P,  
4 Ishikawa T, Aiba T, et al. Novel calmodulin mutations associated with congenital arrhythmia  
5 susceptibility. *Circulation Cardiovascular genetics*. 2014;7:466-474. doi:  
6 10.1161/circgenetics.113.000459
- 7 22. Boczek NJ, Gomez-Hurtado N, Ye D, Calvert ML, Tester DJ, Kryshstal D, Hwang HS, Johnson  
8 CN, Chazin WJ, Loporcaro CG, et al. Spectrum and Prevalence of CALM1-, CALM2-, and  
9 CALM3-Encoded Calmodulin Variants in Long QT Syndrome and Functional Characterization  
10 of a Novel Long QT Syndrome-Associated Calmodulin Missense Variant, E141G. *Circulation  
11 Cardiovascular genetics*. 2016;9:136-146. doi: 10.1161/circgenetics.115.001323
- 12 23. Søndergaard MT, Liu Y, Larsen KT, Nani A, Tian X, Holt C, Wang R, Wimmer R, Van Petegem  
13 F, Fill M, et al. The Arrhythmogenic Calmodulin p.Phe142Leu Mutation Impairs C-domain Ca<sup>2+</sup>  
14 Binding but Not Calmodulin-dependent Inhibition of the Cardiac Ryanodine Receptor. *The  
15 Journal of biological chemistry*. 2017;292:1385-1395. doi: 10.1074/jbc.M116.766253
- 16 24. Søndergaard MT, Sorensen AB, Skov LL, Kjaer-Sorensen K, Bauer MC, Nyegaard M, Linse S,  
17 Oxvig C, Overgaard MT. Calmodulin mutations causing catecholaminergic polymorphic  
18 ventricular tachycardia confer opposing functional and biophysical molecular changes. *The FEBS  
19 journal*. 2015;282:803-816. doi: 10.1111/febs.13184
- 20 25. Wren LM, Jiménez-Jáimez J, Al-Ghamdi S, Al-Aama JY, Bdeir A, Al-Hassnan ZN, Kuan JL,  
21 Foo RY, Potet F, Johnson CN, et al. Genetic Mosaicism in Calmodulinopathy. *Circulation  
22 Genomic and precision medicine*. 2019;12:375-385. doi: 10.1161/circgen.119.002581
- 23 26. Hwang HS, Nitu FR, Yang Y, Walweel K, Pereira L, Johnson CN, Faggioni M, Chazin WJ,  
24 Laver D, George AL, Jr., et al. Divergent regulation of ryanodine receptor 2 calcium release  
25 channels by arrhythmogenic human calmodulin missense mutants. *Circ Res*. 2014;114:1114-  
26 1124. doi: 10.1161/circresaha.114.303391
- 27 27. Brohus M, Arsov T, Wallace DA, Jensen HH, Nyegaard M, Crotti L, Adamski M, Zhang Y, Field  
28 MA, Athanasopoulos V, et al. Infanticide vs. inherited cardiac arrhythmias. *Europace : European  
29 pacing, arrhythmias, and cardiac electrophysiology : journal of the working groups on cardiac  
30 pacing, arrhythmias, and cardiac cellular electrophysiology of the European Society of  
31 Cardiology*. 2021;23:441-450. doi: 10.1093/europace/euaa272
- 32 28. Kato K, Isbell HM, Fressart V, Denjoy I, Debiche A, Itoh H, Poinot J, George AL, Jr.,  
33 Coulombe A, Shea MA, et al. Novel CALM3 Variant Causing Calmodulinopathy With Variable  
34 Expressivity in a 4-Generation Family. *Circulation Arrhythmia and electrophysiology*.  
35 2022;15:e010572. doi: 10.1161/circep.121.010572
- 36 29. Limpitikul WB, Dick IE, Joshi-Mukherjee R, Overgaard MT, George AL, Jr., Yue DT.  
37 Calmodulin mutations associated with long QT syndrome prevent inactivation of cardiac L-type  
38 Ca(2+) currents and promote proarrhythmic behavior in ventricular myocytes. *Journal of  
39 molecular and cellular cardiology*. 2014;74:115-124. doi: 10.1016/j.yjmcc.2014.04.022
- 40 30. Limpitikul WB, Dick IE, Tester DJ, Boczek NJ, Limphong P, Yang W, Choi MH, Babich J,  
41 DiSilvestre D, Kanter RJ, et al. A Precision Medicine Approach to the Rescue of Function on  
42 Malignant Calmodulinopathic Long-QT Syndrome. *Circ Res*. 2017;120:39-48. doi:  
43 10.1161/circresaha.116.309283
- 44 31. Yin G, Hassan F, Haroun AR, Murphy LL, Crotti L, Schwartz PJ, George AL, Satin J.  
45 Arrhythmogenic calmodulin mutations disrupt intracellular cardiomyocyte Ca<sup>2+</sup> regulation by  
46 distinct mechanisms. *Journal of the American Heart Association*. 2014;3:e000996. doi:  
47 10.1161/jaha.114.000996
- 48 32. Wang K, Brohus M, Holt C, Overgaard MT, Wimmer R, Van Petegem F. Arrhythmia mutations  
49 in calmodulin can disrupt cooperativity of Ca(2+) binding and cause misfolding. *The Journal of  
50 physiology*. 2020;598:1169-1186. doi: 10.1113/jp279307

- 1 33. Wang K, Holt C, Lu J, Brohus M, Larsen KT, Overgaard MT, Wimmer R, Van Petegem F.  
2 Arrhythmia mutations in calmodulin cause conformational changes that affect interactions with  
3 the cardiac voltage-gated calcium channel. *Proc Natl Acad Sci U S A*. 2018;115:E10556-e10565.  
4 doi: 10.1073/pnas.1808733115
- 5 34. Rocchetti M, Sala L, Dreizehnter L, Crotti L, Sinnecker D, Mura M, Pane LS, Altomare C, Torre  
6 E, Mostacciuolo G, et al. Elucidating arrhythmogenic mechanisms of long-QT syndrome  
7 CALM1-F142L mutation in patient-specific induced pluripotent stem cell-derived  
8 cardiomyocytes. *Cardiovascular research*. 2017;113:531-541. doi: 10.1093/cvr/cvx006
- 9 35. Sun J, MacKinnon R. Cryo-EM Structure of a KCNQ1/CaM Complex Reveals Insights into  
10 Congenital Long QT Syndrome. *Cell*. 2017;169:1042-1050 e1049. doi:  
11 10.1016/j.cell.2017.05.019
- 12 36. Sanguinetti MC, Curran ME, Zou A, Shen J, Spector PS, Atkinson DL, Keating MT. Coassembly  
13 of K(V)LQT1 and minK (IsK) proteins to form cardiac I(Ks) potassium channel. *Nature*.  
14 1996;384:80-83. doi: 10.1038/384080a0
- 15 37. Barhanin J, Lesage F, Guillemare E, Fink M, Lazdunski M, Romey G. K(V)LQT1 and IsK  
16 (minK) proteins associate to form the I(Ks) cardiac potassium current. *Nature*. 1996;384:78-80.  
17 doi: 10.1038/384078a0
- 18 38. Sun J, MacKinnon R. Structural Basis of Human KCNQ1 Modulation and Gating. *Cell*. 2019.  
19 doi: 10.1016/j.cell.2019.12.003
- 20 39. Sachyani D, Dvir M, Strulovich R, Tria G, Tobelaim W, Peretz A, Pongs O, Svergun D, Attali B,  
21 Hirsch JA. Structural basis of a Kv7.1 potassium channel gating module: studies of the  
22 intracellular c-terminal domain in complex with calmodulin. *Structure*. 2014;22:1582-1594. doi:  
23 10.1016/j.str.2014.07.016
- 24 40. Bartos DC, Morotti S, Ginsburg KS, Grandi E, Bers DM. Quantitative analysis of the Ca(2+) -  
25 dependent regulation of delayed rectifier K(+) current I(Ks) in rabbit ventricular myocytes. *The*  
26 *Journal of physiology*. 2017;595:2253-2268. doi: 10.1113/jp273676
- 27 41. Tobelaim WS, Dvir M, Lebel G, Cui M, Buki T, Peretz A, Marom M, Haitin Y, Logothetis DE,  
28 Hirsch JA, et al. Competition of calcified calmodulin N lobe and PIP2 to an LQT mutation site in  
29 Kv7.1 channel. *Proc Natl Acad Sci U S A*. 2017;114:E869-E878. doi: 10.1073/pnas.1612622114
- 30 42. Hou P, Kang PW, Kongmeneck AD, Yang N-D, Liu Y, Shi J, Xu X, White KM, Zaydman MA,  
31 Kasimova MA, et al. Two-stage electro-mechanical coupling of a KV channel in voltage-  
32 dependent activation. *Nature communications*. 2020;11:676. doi: 10.1038/s41467-020-14406-w
- 33 43. Taylor KC, Kang PW, Hou P, Yang ND, Kuenze G, Smith JA, Shi J, Huang H, White KM, Peng  
34 D, et al. Structure and physiological function of the human KCNQ1 channel voltage sensor  
35 intermediate state. *eLife*. 2020;9. doi: 10.7554/eLife.53901
- 36 44. Zaydman MA, Kasimova MA, McFarland K, Beller Z, Hou P, Kinser HE, Liang H, Zhang G, Shi  
37 J, Tarek M, et al. Domain-domain interactions determine the gating, permeation, pharmacology,  
38 and subunit modulation of the I(Ks) ion channel. *eLife*. 2014;3:e03606. doi: 10.7554/eLife.03606
- 39 45. Erickson MG, Liang H, Mori MX, Yue DT. FRET two-hybrid mapping reveals function and  
40 location of L-type Ca<sup>2+</sup> channel CaM preassociation. *Neuron*. 2003;39:97-107.
- 41 46. Bal M, Zaika O, Martin P, Shapiro MS. Calmodulin binding to M-type K<sup>+</sup> channels assayed by  
42 TIRF/FRET in living cells. *The Journal of physiology*. 2008;586:2307-2320. doi:  
43 10.1113/jphysiol.2008.152777
- 44 47. Rivas S, Hanif K, Chakouri N, Ben-Johny M. Probing ion channel macromolecular interactions  
45 using fluorescence resonance energy transfer. *Methods in enzymology*. 2021;653:319-347. doi:  
46 10.1016/bs.mie.2021.01.047
- 47 48. Alberdi A, Gomis-Perez C, Bernardo-Seisdedos G, Alaimo A, Malo C, Aldaregia J, Lopez-  
48 Robles C, Areso P, Butz E, Wahl-Schott C, et al. Uncoupling PIP2-calmodulin regulation of  
49 Kv7.2 channels by an assembly destabilizing epileptogenic mutation. *Journal of cell science*.  
50 2015;128:4014-4023. doi: 10.1242/jcs.176420



- 1 49. Koushik SV, Chen H, Thaler C, Puhl HL, 3rd, Vogel SS. Cerulean, Venus, and VenusY67C  
2 FRET reference standards. *Biophysical journal*. 2006;91:L99-1101. doi:  
3 10.1529/biophysj.106.096206
- 4 50. Haitin Y, Wiener R, Shaham D, Peretz A, Cohen EB, Shamgar L, Pongs O, Hirsch JA, Attali B.  
5 Intracellular domains interactions and gated motions of I(KS) potassium channel subunits. *The*  
6 *EMBO journal*. 2009;28:1994-2005. doi: 10.1038/emboj.2009.157
- 7 51. Ben-Johny M, Yue DN, Yue DT. Detecting stoichiometry of macromolecular complexes in live  
8 cells using FRET. *Nature communications*. 2016;7:13709. doi: 10.1038/ncomms13709
- 9 52. Butz ES, Ben-Johny M, Shen M, Yang PS, Sang L, Biel M, Yue DT, Wahl-Schott C. Quantifying  
10 macromolecular interactions in living cells using FRET two-hybrid assays. *Nature protocols*.  
11 2016;11:2470-2498. doi: 10.1038/nprot.2016.128
- 12 53. Lek M, Karczewski KJ, Minikel EV, Samocha KE, Banks E, Fennell T, O'Donnell-Luria AH,  
13 Ware JS, Hill AJ, Cummings BB, et al. Analysis of protein-coding genetic variation in 60,706  
14 humans. *Nature*. 2016;536:285-291. doi: 10.1038/nature19057
- 15 54. Hou P, Eldstrom J, Shi J, Zhong L, McFarland K, Gao Y, Fedida D, Cui J. Inactivation of  
16 KCNQ1 potassium channels reveals dynamic coupling between voltage sensing and pore  
17 opening. *Nature communications*. 2017;8:1730. doi: 10.1038/s41467-017-01911-8
- 18 55. Wang Q, Curran ME, Splawski I, Burn TC, Millholland JM, VanRaay TJ, Shen J, Timothy KW,  
19 Vincent GM, de Jager T, et al. Positional cloning of a novel potassium channel gene: KVLQT1  
20 mutations cause cardiac arrhythmias. *Nature genetics*. 1996;12:17-23. doi: 10.1038/ng0196-17
- 21 56. Cui J, Kline RP, Pennefather P, Cohen IS. Gating of IsK expressed in *Xenopus* oocytes depends  
22 on the amount of mRNA injected. *The Journal of general physiology*. 1994;104:87-105. doi:  
23 10.1085/jgp.104.1.87
- 24 57. Pipilas DC, Johnson CN, Webster G, Schlaepfer J, Fellmann F, Sekarski N, Wren LM,  
25 Ogorodnik KV, Chazin DM, Chazin WJ, et al. Novel calmodulin mutations associated with  
26 congenital long QT syndrome affect calcium current in human cardiomyocytes. *Heart rhythm*.  
27 2016;13:2012-2019. doi: 10.1016/j.hrthm.2016.06.038
- 28 58. Chang A, Abderemane-Ali F, Hura GL, Rossen ND, Gate RE, Minor DL, Jr. A Calmodulin C-  
29 Lobe Ca(2+)-Dependent Switch Governs Kv7 Channel Function. *Neuron*. 2018;97:836-852.e836.  
30 doi: 10.1016/j.neuron.2018.01.035
- 31 59. Kim CW, Aronow WS, Dutta T, Frenkel D, Frishman WH. Catecholaminergic Polymorphic  
32 Ventricular Tachycardia. *Cardiology in review*. 2020;28:325-331. doi:  
33 10.1097/crd.0000000000000302
- 34 60. Wu X, Bers DM. Free and bound intracellular calmodulin measurements in cardiac myocytes.  
35 *Cell calcium*. 2007;41:353-364. doi: 10.1016/j.ceca.2006.07.011
- 36 61. Bogdanov V, Soltisz AM, Hernandez Orengo B, Sakuta G, Veeraraghavan R, Davis JP, Gyorke  
37 S. Spatially and functionally distinct pools of calmodulin mRNA in cardiac myocytes.  
38 *Biophysical journal*. 2022;121:257a. doi: <https://doi.org/10.1016/j.bpj.2021.11.1469>
- 39 62. Erickson MG, Alseikhan BA, Peterson BZ, Yue DT. Preassociation of calmodulin with voltage-  
40 gated Ca(2+) channels revealed by FRET in single living cells. *Neuron*. 2001;31:973-985.

41
